# Supplementary material for: TRIM25 Enhances the Antiviral Action of Zinc-Finger Antiviral Protein (ZAP)
Source: PLoS Pathog. 2017 Jan 6;13(1):e1006145. doi: 10.1371/journal.ppat.1006145 (PMC5245905; doi:10.1371/journal.ppat.1006145)
Supplement: S1 Table — The raw luciferase data collected from the T-REx-hZAP cell line, and the corresponding library gene list and controls are shown. Raw luciferase values are color-coded based on their magnitude (red: high; yellow: medium; green: low). Each column represents a different 384-well plate. A total of 58 plates were tested (H101-H158) in triplicates (A, B and C). (XLSX) [file ppat.1006145.s006.xlsx]

## Sheet: Raw luciferase data
Well	H101A	H101B	H101C	H102A	H102B	H102C	H103A	H103B	H103C	H104A	H104B	H104C	H105A	H105B	H105C	H106A	H106B	H106C	H107A	H107B	H107C	H108A	H108B	H108C	H109A	H109B	H109C	H110A	H110B	H110C	H111A	H111B	H111C	H112A	H112B	H112C	H113A	H113B	H113C	H114A	H114B	H114C	H115A	H115B	H115C	H116A	H116B	H116C	H117A
A02	7712	6387	8721	6435	8323	6114	6600	3185	9881	10538	10807	3554	1101	347	355	793	755	513	4947	5920	3544	8293	3389	8758	3702	5119	8004	1680	1280	2040	1560	1440	1960	1160	1800	1200	200	1400	760	480	480	1440	640	400	1280	1360	2800	3280	1640
A03	7535	10910	6455	5833	10467	9247	7442	12991	13670	14143	13423	4536	2264	1551	315	634	591	913	6143	4583	6269	7929	4863	8854	6774	8259	9280	3000	1120	2000	2320	2000	1760	1200	1960	4160	600	920	520	760	680	720	600	720	280	1520	4560	4240	1960
A04	605	1269	819	1623	4868	1870	10340	6188	15147	20160	16353	5843	1335	942	310	265	670	189	3868	3255	3978	7352	5062	7517	2235	2005	3193	2400	1000	1960	2440	1960	2640	1440	1040	2080	960	760	800	880	200	400	1080	680	760	3200	4000	2640	3200
A05	5002	1603	2071	984	1230	422	7599	9181	9436	3516	5633	1348	1265	1386	1350	1906	1074	875	8782	12356	10711	4715	3977	3480	3406	3909	3547	2560	2480	4520	2960	2280	3400	1880	1280	1280	1600	400	920	680	600	1080	520	840	960	2320	2160	2080	3720
A06	10158	11535	12818	6222	15992	6316	8900	10501	10320	3273	4850	1095	898	1263	938	1584	271	470	3794	1431	1795	3950	2787	3138	4141	3522	7978	2400	1000	2240	2600	1320	2600	1000	1280	1240	560	880	320	1480	720	1360	800	560	720	2640	2920	2960	4200
A07	5512	6638	5113	5710	6042	4901	14683	19627	21142	19397	13350	1539	1819	909	1106	468	271	514	3327	2688	3594	16071	9780	12173	5161	3630	6896	2200	2360	1840	2800	2520	1280	1720	1720	1840	600	520	200	600	720	520	760	1360	1200	2880	2920	1960	2960
A08	4502	4842	3540	2829	2459	3159	6769	9690	9008	8187	9541	1955	1335	302	704	155	837	74	2719	2650	1290	3007	1968	3163	9642	6915	16915	2200	1440	2520	2160	1920	2080	1800	1120	1600	480	880	600	1440	1080	1000	840	960	1000	3960	2040	1120	3000
A09	6757	5276	5385	1770	1613	992	6953	13858	8625	9280	5315	2882	186	74	392	154	69	113	8335	21550	27242	8469	7894	4454	25528	24260	14840	1360	920	2280	1720	1560	2800	2200	2080	3600	1280	320	480	640	760	1000	640	640	520	2960	3000	2680	2880
A10	48567	55080	64408	4981	4250	2519	3583	4592	2447	9420	8235	2865	68	467	231	233	396	118	3526	2722	1854	10156	8812	7415	1007	2015	328	1560	1600	2840	2400	1200	1680	1920	1160	760	1920	1360	1440	640	520	1120	440	840	680	3440	3080	3000	1400
A11	3564	5251	4005	7195	7770	6082	21032	34093	58500	23630	22500	4381	1810	1823	1029	910	392	154	17114	26672	26927	13764	9829	13363	7618	5874	7863	1920	1840	2920	2400	2720	2840	2080	960	2600	560	920	880	600	640	520	1280	360	480	3200	3000	2000	4760
A12	1160	1544	825	6002	4348	7149	7963	17577	9492	33078	38086	12484	1375	1142	468	53	136	100	6791	8378	4739	12904	11737	8071	4736	2348	4572	3040	520	960	2200	1880	2120	1320	1200	1080	520	560	880	1040	840	1040	1240	320	320	2640	1720	2200	5040
A13	1194	2366	2159	9972	9736	6556	12330	23871	24058	1850	2304	855	1975	733	500	3713	3870	2915	4275	4807	3100	1353	783	1090	7993	7056	8614	2240	1400	760	1920	1680	2080	1560	920	440	1280	240	800	1080	1400	1120	520	320	560	3360	2720	3080	1120
A14	2174	2502	3017	41861	24723	19144	12099	9397	6683	4875	2950	1303	1218	2186	1312	858	1135	501	7088	9061	8598	5640	3935	3369	23208	15250	24499	2080	1280	1600	2160	2720	1760	1640	920	1000	360	1040	440	800	520	280	880	400	1160	2040	3480	1680	2720
A15	5815	5203	7139	8939	7979	5542	12653	12247	14737	25166	19156	6406	1422	541	184	70	150	353	11546	9091	8576	3970	1802	2444	16578	10245	19424	1480	1040	2120	3400	1240	1520	2800	920	2120	1200	1320	360	280	800	1320	360	680	1120	2880	3320	3080	3120
A16	2348	2795	1865	3600	2245	2253	5874	11868	11038	12220	15457	3303	1131	779	549	793	512	635	4874	4691	6978	7166	3862	5900	10479	3884	5462	2400	1840	1360	1880	2200	1440	1360	1720	2040	680	440	1080	1040	1240	1200	360	440	840	6000	2760	3800	2600
A17	1876	1705	949	15426	15985	11076	7005	13473	10973	13062	19792	3034	2299	1583	913	671	872	272	5961	4129	3498	5984	6650	6936	3008	1896	3166	2520	1080	1360	3600	2880	1360	1600	1400	2920	840	1280	680	680	840	760	720	800	1000	3080	3640	2360	1480
A18	2804	5639	5811	7095	2429	2321	3875	7004	6352	7669	10156	4237	1777	1426	108	588	193	153	15717	21024	17879	8811	8112	10552	8292	5441	9700	2720	1600	2360	1960	2160	1000	1920	1520	2360	920	880	800	640	360	760	760	440	520	1880	2760	3800	960
A19	1868	2130	2248	8880	8918	6391	6913	9203	7822	3503	1509	795	1701	899	1112	1271	272	433	10834	8731	7555	5222	3686	2906	5776	3045	4586	2320	2040	1560	3160	1800	1720	2280	1280	2480	760	1840	600	560	560	760	520	280	1160	3640	3080	2040	2840
A20	4361	6214	4895	14630	8024	8833	4607	5386	7613	7273	7309	2053	981	1147	588	547	594	595	2130	3130	1194	2239	4035	4391	8878	6191	13300	2400	1240	1240	2040	3400	1640	1920	1080	2120	1640	840	640	1120	800	520	560	1080	1200	2080	3200	1640	1480
A21	4421	8476	8005	13709	9433	10074	72187	108519	110778	6484	8593	2163	688	772	213	793	550	273	5372	8904	5334	8604	7862	9898	6683	7967	10374	1960	1600	2320	2920	2080	1520	1720	2080	1400	1280	240	640	840	1920	720	600	800	520	3400	4280	3360	2760
A22	5860	8256	7263	7003	5347	4891	5902	9942	9371	6183	8054	2489	1191	1221	912	418	942	309	3947	6219	6785	8666	5159	5105	6813	4479	8026	3560	2600	1720	3200	1920	1560	1160	2000	720	760	1280	600	1160	1520	640	480	760	1840	2600	3360	3280	2040
A23	4936	6799	7172	9300	5949	3808	5120	9031	6615	8164	8719	2002	742	2007	816	1345	783	508	5112	4815	6429	4871	6646	7856	6970	6343	7791	2040	1360	1800	1400	1360	1840	1280	1040	1800	1160	480	680	800	320	1080	560	480	640	2400	3400	3360	1320
B02	8139	5713	7662	9110	10317	5978	6707	11178	7501	18224	13723	3588	1063	714	553	548	267	228	3220	2332	3749	3817	4222	5580	3434	6163	11380	2320	1400	2080	1840	2360	1760	1040	1520	1200	960	600	320	1600	840	2120	480	440	1120	2440	3480	3200	3200
B03	3030	1001	1932	14569	17725	12202	4048	6208	5228	15273	11551	2084	409	216	189	71	231	470	1191	898	1514	4227	1580	2658	5768	3657	9955	2760	1080	2760	1840	1840	1160	1320	1640	2160	840	520	1800	240	480	280	640	600	920	2440	3000	2480	1880
B04	762	3632	2220	10370	11762	6395	9959	15848	7740	3101	3146	553	1017	309	154	190	112	195	1536	1978	1343	3039	1410	2378	10919	7146	15413	2520	1040	2080	1680	2240	2920	480	1760	2040	1080	1400	560	1040	280	1240	640	640	720	3080	2880	2480	1880
B05	10412	8184	9464	1932	2172	2044	2255	7944	3633	20418	15849	2454	412	220	459	582	189	150	2507	2939	2749	3819	3356	3509	6595	3270	5118	1680	1200	2320	2240	1680	1640	2040	1600	2080	840	520	720	1240	400	800	400	640	920	3240	2080	1680	1840
B06	3827	3090	3622	10719	15260	9487	2567	3048	5107	6710	7654	1473	863	745	1505	463	273	431	3106	875	735	2495	2723	2479	9122	13634	14816	2640	1640	1440	2480	2200	3160	1880	760	1680	800	1400	1280	880	680	2160	480	720	520	2560	2360	2200	4560
B07	8097	5438	6296	14161	16981	15388	12324	17667	19627	1828	316	548	1410	458	897	455	553	506	13758	15972	19377	8707	13018	12727	7237	5422	7869	1600	2080	1360	2680	1480	2640	4040	1560	4560	280	760	1440	320	1080	1120	600	560	800	2000	2400	1320	1080
B08	11082	7410	12715	8397	10058	8387	5112	7398	4317	103577	100026	17986	2414	2227	1344	304	100	386	2634	2594	3149	10116	2395	4305	4908	1758	345	2280	1320	520	2960	2840	2160	920	1680	760	720	600	1120	440	920	1200	320	600	360	1520	2120	2240	3760
B09	99178	143205	144458	18843	12251	9944	19409	32356	26766	9736	10454	1642	1118	216	543	673	756	994	5207	10252	10356	2777	922	1170	1736	1470	4000	2800	2240	1800	1760	880	800	3000	840	1600	1040	360	1240	1400	480	1160	360	800	1040	2920	1560	1560	4920
B10	927	1325	844	30231	17227	14512	3514	3475	3455	6247	8743	2426	89	347	227	145	187	148	2136	1832	869	7075	1552	810	8775	3224	4408	1960	2240	2840	3280	800	1480	1760	1600	2960	920	480	840	1560	800	320	400	400	520	2400	2120	2160	7080
B11	7337	6401	6000	11044	18143	11261	11059	10713	12144	9306	7502	2383	3983	1501	1229	1432	916	754	4797	4215	5987	4688	2938	5326	4871	3594	12208	2480	1520	1560	3680	2640	3720	1240	1680	2400	680	280	1000	1320	2560	720	1280	960	960	2720	1760	1200	3240
B12	1856	1909	3146	10878	5837	3381	1782	3418	1682	2560	1749	868	525	539	519	309	70	512	1611	1152	2366	1756	490	1316	10125	10590	17007	2160	1280	1800	5320	2520	5040	3720	7480	12240	1160	880	1000	2520	560	1200	760	640	520	3400	2560	4040	1920
B13	11954	9054	10535	7351	3857	3115	6445	9961	8382	39428	33782	5158	1781	1459	1829	254	455	219	8365	9894	11694	4320	1808	1124	1814	832	3985	1960	1480	2000	600	1200	1320	2160	2080	2400	1160	720	360	560	920	1240	1120	1840	1440	2560	2280	3280	1360
B14	8023	5496	4771	12535	10032	4715	13787	13298	16877	9211	8462	2869	568	1252	694	111	469	154	4105	3682	2690	1541	1743	1861	2269	2220	4096	2320	1280	2160	1520	1040	880	1800	1200	640	520	320	880	880	520	1400	840	400	560	1400	1880	1480	1640
B15	6874	8302	5910	8537	5283	3334	73232	128667	123184	2908	3500	1363	896	457	1027	72	107	73	4642	5637	2927	6844	6278	4299	6093	1380	1426	2000	1920	1680	1880	2640	2000	1200	1520	880	120	880	760	800	1680	1040	1080	560	600	560	1240	1280	4840
B16	1484	1040	1621	3885	3460	2244	8547	9754	7882	1223	1007	766	1463	1547	865	468	303	263	5046	6111	6078	10185	1790	1133	1717	1453	1969	2400	1560	3000	2560	1720	880	600	1040	640	680	320	600	560	600	1680	1080	440	1720	3240	2240	3000	1600
B17	2721	1479	1452	20332	26432	24835	75700	104848	124483	4409	4110	640	728	736	503	270	670	632	521	1138	405	8219	7497	9055	8482	2134	5204	2120	1200	1920	1040	1080	1760	1680	960	1880	720	600	440	1480	1000	920	680	1440	1120	2680	4080	3360	1560
B18	2572	3251	1761	8612	5510	3570	6751	10118	7986	13670	14737	3770	100	55	69	272	110	591	5097	4111	3250	15314	19745	27347	3117	1883	2752	2200	1960	2880	2680	1400	1960	2760	2800	3160	1000	440	480	3080	1360	1200	880	560	1840	1840	3040	2240	1600
B19	9369	7840	9527	6673	3845	4642	6180	14252	8959	31068	34737	8985	579	1150	786	386	715	432	4623	2460	3267	6266	7995	8832	1299	1711	886	1360	1480	1840	2200	2760	960	1160	1560	2600	400	640	760	2040	920	1960	760	640	1200	2440	3120	2080	1240
B20	551	1016	1263	7784	5915	6315	6295	7332	9011	5030	5537	1741	885	607	811	312	310	148	3327	1603	2036	7914	3572	3008	9282	4923	9903	1560	1760	1880	3360	1920	1920	3280	1280	2520	880	640	720	1200	1160	840	640	160	640	2120	520	1600	2120
B21	256	355	1104	1608	1876	1493	4856	11620	6463	14147	14105	1896	3622	2581	3265	300	221	306	13229	14952	18095	2331	943	1373	5002	2178	4566	2360	1840	1840	2440	1960	1200	2080	1040	1360	400	1440	1080	1080	1200	600	1040	560	440	1440	2680	2240	4680
B22	8384	10438	9368	5082	8332	5563	12521	22681	17753	23981	30135	8506	146	459	346	1731	1806	1090	6119	4200	4923	10539	7094	6414	12582	14660	20270	3040	1200	2840	3120	2760	1240	1800	1480	2320	1240	1040	1040	560	2640	2880	1400	1160	1000	3240	2120	2480	3720
B23	8174	8209	6708	7123	7543	4529	4063	9370	5093	9941	9248	2664	358	2930	1575	354	414	0	4208	2738	6197	4328	5539	2838	3054	2542	4007	1920	4080	3200	2640	3800	2680	1920	2280	3760	2880	2240	2560	1960	3240	4000	2920	2520	2280	5120	4120	4800	4880
C02	6953	7864	6541	9241	10065	7037	5644	8467	9438	12382	19808	3559	1373	295	660	1145	1223	1062	4488	5180	3882	5611	5136	6268	5775	4758	6725	1960	2200	2880	3160	2360	2560	1640	1040	2520	1040	920	1600	640	560	1040	720	960	440	2320	1480	2240	1720
C03	13918	8212	10134	8689	9176	6530	10238	8668	16011	22496	20839	4842	1177	1791	951	215	616	376	5016	2091	4057	8842	7383	8559	3686	1412	4507	1560	1280	1320	2320	1760	2040	1360	1200	1880	680	1440	520	240	920	480	1280	1160	1120	2160	3320	3520	3320
C04	6758	5043	5386	8368	10237	5908	4709	6195	7834	19252	16059	5183	1737	499	101	792	231	72	3618	3790	1824	6153	2339	4327	224099	246488	297276	1320	520	1640	2360	760	3120	1040	1200	2160	720	720	840	1120	1000	680	760	920	400	2560	3360	2240	3240
C05	2246	1364	1653	4136	5060	4173	5660	10353	7177	3819	2508	1109	1934	1067	830	675	547	283	3120	2780	3467	7685	6831	7739	3601	3186	6361	1040	1240	2440	3040	1040	1960	1080	1080	2600	880	400	920	1640	1320	1200	520	640	880	2000	3160	2200	2720
C06	2210	1716	3235	13496	11163	10684	3597	5148	4210	25554	18471	4188	170	665	345	333	189	421	3772	1967	1963	2005	1483	2050	2777	2783	4340	1800	1200	1920	560	720	1280	2520	1960	2680	1080	1080	1800	1760	2640	2360	680	640	800	1160	2360	2440	2320
C07	4396	3817	3393	10291	7275	7478	5094	7572	7054	9079	8912	2612	305	65	189	3144	586	1227	5243	5517	3261	9376	17544	15414	9936	12729	15491	1560	920	1600	1880	1160	1800	1480	3600	3400	560	400	1000	280	720	400	1200	1080	1520	3080	5280	3960	1080
C08	3089	3531	5384	14715	7660	9495	5769	5018	2350	32023	44436	12327	754	1246	622	1615	1509	945	8034	7921	6588	7145	6191	6772	4559	7640	9510	1400	1640	1200	2040	1480	1400	1720	1000	2680	600	760	840	1000	440	1120	1040	720	760	3400	3400	2000	2760
C09	3917	2753	2663	8729	11808	7363	10799	10930	10445	14625	19994	5012	4899	1709	1067	624	384	425	6878	7416	5132	7013	1793	2697	916	1205	1570	2040	1600	2640	1440	2440	1120	1120	520	2040	280	680	400	1880	4200	2120	640	480	1040	2800	1280	1600	8720
C10	2645	4126	1282	9218	3111	6042	9820	10140	5558	4988	4512	2540	366	138	228	354	275	274	4810	5196	4669	11620	10205	12814	3431	2510	3251	3040	1120	1000	2000	1760	800	1720	960	3280	640	680	360	440	240	880	720	440	680	2600	1960	1680	4520
C11	3642	4076	4656	973	566	574	5780	9908	10807	12295	5116	2288	416	669	169	27	29	232	8154	10513	7888	4380	6064	4531	3485	2666	4528	1760	360	1760	3080	1640	3280	1400	1360	1520	640	480	840	1360	520	1000	240	640	480	4680	8200	7520	1400
C12	5243	6139	6349	4084	2660	3158	6039	15355	11700	11618	16216	3697	6307	6821	3828	262	224	301	6350	7151	4667	7379	3118	7588	23309	23568	42324	1960	1680	1400	2280	1320	2320	1240	1440	840	360	440	680	1320	2280	2200	280	320	320	3440	4760	4720	7880
C13	10910	14636	14299	10705	6851	7414	6436	8351	9897	8546	3590	2707	261	1068	124	473	152	193	17539	16244	17792	1977	2318	1761	5312	2645	8091	1000	400	640	920	1000	1040	1440	1680	1160	560	480	800	1080	480	1320	520	960	840	2920	3440	4600	1320
C14	691188	809475	781780	11090	10299	10976	3915	6941	6018	7854	5742	1215	1867	817	547	432	148	154	3680	3299	3270	8072	5323	8997	6542	7486	9885	2400	1240	1640	2480	1320	1520	920	520	520	920	680	400	1000	560	1920	720	1360	1040	1080	1160	1640	1560
C15	6696	3875	8279	13783	13216	5850	7418	21110	10199	16605	10484	3720	742	703	506	821	1344	419	7442	10240	9970	4638	1893	5159	5319	3778	5321	2400	960	1920	2280	2400	2680	2280	1120	2320	640	1040	440	1680	1040	1440	440	560	760	2920	2640	2200	440
C16	8787	8749	8262	9295	5283	4614	6198	8147	7997	4089	3562	505	206	373	529	946	1827	1674	2606	4002	3780	8907	5550	6886	3938	4347	7557	2040	2200	1160	1960	2080	1440	2080	1400	960	600	840	440	520	440	720	1200	1400	1480	2600	3120	3720	2040
C17	697	1109	310	5141	4607	5031	5953	10240	8359	20015	23107	6515	1872	1107	1110	430	504	221	19566	25307	21962	7956	4420	4661	5635	6353	5419	1880	1480	2520	5440	2000	1680	2840	2440	4080	920	360	640	840	1040	800	640	1160	680	3800	2920	3520	800
C18	4494	4627	4686	6309	4642	2155	175167	205227	352450	22781	26519	5738	381	1109	548	72	195	433	4386	5401	5064	6021	7387	9195	3821	4414	6927	1880	1560	2080	2680	1720	1880	10560	6400	8840	560	360	920	1240	1200	1320	600	440	600	3800	2680	3960	1480
C19	165	428	245	11509	7207	4605	82350	119655	187544	22064	16937	3194	983	215	542	584	148	224	5050	2824	2906	2649	2351	3735	6879	5916	10038	3280	1880	1400	3440	4760	2920	880	920	1760	1160	1360	1120	720	1000	1400	680	560	1160	2240	1520	2240	1480
C20	2001	4132	1753	8209	8204	7201	8506	6787	7197	13533	19492	4692	1047	985	503	189	188	750	7289	36470	50192	4205	6118	5109	5476	3330	5327	2160	960	3080	2080	1320	1440	1840	1600	1360	440	480	1760	960	1440	720	2000	720	1120	2200	2040	1960	5280
C21	5107	9509	5505	7599	5458	4205	6976	9069	9660	16383	15033	6145	1313	1402	1203	702	619	935	8330	7438	5434	6786	5986	6994	6880	5026	8492	1880	1440	1880	1960	2400	1640	3000	1600	2040	840	1480	1080	1520	1360	600	600	680	1000	3160	3320	3160	2240
C22	770	1664	1356	5074	4850	2971	5194	11783	7692	21468	29089	6824	1235	812	372	596	1133	1111	6650	6732	5096	4214	2449	2620	4739	2485	6199	3040	3240	4360	2840	3840	3800	2120	3000	3160	3040	2480	2440	2120	3280	2800	2400	1800	2600	4560	3880	5760	4160
C23	823528	929043	955435	657944	611063	618549	687449	523248	639014	788589	740801	260149	303350	314019	329106	316512	313512	325071	59276	472551	582397	489515	431447	615761	426520	532382	650954	183560	454920	468040	167280	400240	419920	111160	345200	459120	364920	344400	439480	293440	416680	388320	352480	351320	418120	479400	496280	505080	544560
D02	9441	4590	8047	7147	6330	5550	6567	9182	9007	15853	9501	2813	1173	644	516	155	389	871	4374	3160	3468	6261	4614	6530	2692	3627	6484	1480	3640	2440	1720	1680	2840	1160	3200	3040	2040	2280	3040	1800	1200	2200	2360	1920	2280	3480	5560	5320	2800
D03	4521	5000	4460	1612	1585	1293	14187	16469	18053	13962	9424	2904	372	485	686	2375	2611	2729	1903	2429	3796	4776	888	822	1879	3217	6299	2160	1480	2400	1280	1680	1880	1080	1680	1680	840	760	960	1680	640	1360	440	560	880	2240	2640	2280	2040
D04	11826	7584	16910	18047	17255	13427	4471	15897	5450	17466	12193	3438	14413	7744	1469	266	214	389	1281	2028	1052	2989	2406	1481	2109	2957	3694	1840	680	1880	1600	2160	2360	2280	2120	2000	880	240	760	1480	720	1000	920	800	760	1440	2240	3480	2160
D05	7984	5625	8081	8732	8240	7413	14200	17220	16717	17080	15958	4419	2173	776	784	6429	8989	5945	4291	1732	2675	1122	1376	807	4746	2945	3653	1040	1520	1880	2080	1240	1600	1880	1720	2200	1240	520	800	1080	360	440	400	1080	1000	1880	2520	3160	2880
D06	8914	6462	6176	7285	7040	6290	8349	16564	14313	52463	46340	11117	2301	823	190	433	461	1307	7623	10812	13192	772	732	948	1553	888	1053	2080	1040	1880	1400	1000	640	1240	1280	1920	600	1080	840	1560	960	1120	840	280	560	2520	1720	1160	2760
D07	1144	286	344	12839	14948	14782	4110	5388	6812	10789	8410	2096	210	208	107	454	266	496	2392	3192	4037	7678	3340	4193	3693	3562	4532	1480	1880	2160	1240	880	1160	1760	1160	2680	600	320	760	960	1640	1280	840	960	880	1160	1640	1080	4760
D08	6582	3880	3862	8592	9837	9464	5522	5961	8107	12085	7876	1690	538	2101	585	383	784	588	7431	5190	4459	4679	1066	3821	5792	5695	5481	2480	1280	2480	2280	1640	2280	2960	1920	2600	840	720	800	360	480	560	1400	840	760	3160	3400	2760	1000
D09	3867	2171	3681	5431	3636	2203	8018	7800	7253	4747	4980	2648	1437	327	981	232	310	552	10737	16686	11939	4425	5342	4714	4994	1471	2757	2000	960	1200	1840	1480	2000	1480	720	720	1160	760	680	560	600	1280	480	200	840	1080	1160	1440	1120
D10	3374	3072	3641	6540	7520	5553	4452	7135	3796	4024	2569	764	602	1213	691	233	190	152	2289	1995	2028	6324	3729	3309	2343	1388	1142	2400	1120	1440	1200	1480	1800	1240	1680	2120	1360	600	880	1600	1160	1880	840	360	1240	1960	2040	1480	3040
D11	5688	5248	4661	8641	10499	5539	5038	8511	11934	35579	36943	4252	860	619	226	302	581	139	6313	5897	4356	1208	800	789	10447	8590	12558	2320	2000	1800	2120	1520	1840	7520	6200	9440	640	1320	520	1600	760	1080	1720	3280	3680	2840	1920	2200	1480
D12	14917	14522	11364	5038	4146	3018	7254	7255	9231	15117	13863	5183	994	1033	1254	2392	2589	2511	2825	1949	2738	9712	5706	8561	3920	3509	4392	1400	1040	2760	2440	1000	1080	1960	1520	1400	1000	600	720	1280	920	920	800	840	1160	2760	1800	2560	2240
D13	2302	843	1042	8360	9557	8767	5463	4711	6253	15049	24962	6546	663	261	303	300	623	538	6393	7073	2911	5716	4381	3575	5579	3038	6266	1640	2040	2160	1240	520	1520	1560	2440	1600	840	400	240	320	400	1120	720	280	1040	840	880	960	1280
D14	4182	2046	2094	10648	8818	7251	874	2027	1210	12701	8722	2277	577	936	906	63	148	183	6738	9352	7097	6998	7426	5592	4197	4169	9702	1840	2040	3000	2000	1600	1760	4240	2800	2720	480	400	960	1520	960	1000	1120	480	1160	2520	1360	2720	840
D15	6612	6652	7376	31159	33389	22169	6833	9050	7089	11990	7150	3854	239	1406	406	1973	730	1854	2519	707	1955	4973	1923	1349	4880	4849	9305	1440	1240	1560	1640	2080	2880	1280	920	1480	1360	240	1120	1080	680	880	640	1640	1520	3040	1200	2240	11720
D16	3593	5507	2828	9456	6084	5154	4425	7779	5075	17479	14726	5916	2030	1543	3028	819	142	172	2697	1109	1440	7803	7795	9164	5328	4896	8961	1760	1600	1480	2400	600	920	1480	840	360	1080	120	760	920	1320	640	680	1040	680	3840	2640	3440	2560
D17	2344	1288	1750	10082	5071	5699	3953	6140	5949	37089	39281	15411	53	138	133	507	145	674	4902	5314	3901	5827	4366	6574	5938	4564	5272	3080	2280	3120	3040	2040	1200	3120	1200	1160	680	560	680	1000	600	680	2200	1280	2360	3280	2000	2640	7040
D18	8125	4274	3414	12208	10595	8875	7251	8269	9194	11200	8795	4488	342	616	417	104	149	106	8660	3114	3045	5880	4282	7870	9132	4700	8873	1280	1000	520	1440	1800	2760	3520	2160	2920	600	960	520	1400	1040	1960	1640	880	1040	2800	1440	3600	2880
D19	4703	7041	4766	8973	10274	6293	5120	6725	6129	14045	9306	3134	937	1152	1391	2222	990	1312	2992	1545	1446	3087	1381	2557	3403	5344	8258	3320	1440	1640	1320	920	1000	2200	920	1480	560	880	960	1600	1080	480	1120	320	1080	2400	2200	2120	1320
D20	821	981	1031	7059	9138	5905	6798	9300	8974	3418	2227	898	2620	383	383	300	1067	501	2825	3256	4008	3037	2464	2230	6252	3777	5900	2600	1520	2920	2600	1600	2440	1640	560	2200	1280	560	680	1400	640	960	1080	960	2400	3920	2600	3280	2000
D21	8910	4761	7234	9860	6703	5257	2394	3124	5333	13653	13110	1964	895	707	748	304	376	586	6476	4348	3731	3060	4668	2642	3465	5579	6276	1280	1040	2440	2720	2120	1320	1760	2040	2480	800	720	840	1040	400	600	1120	440	1160	2520	2040	2640	6000
D22	7948	9413	7657	10508	9947	6622	3409	4780	4175	4811	7594	3040	161	368	168	368	327	323	3509	5387	4458	4332	2463	4128	6353	4296	7825	2000	1280	2360	1520	3160	2920	2200	2520	1400	1000	760	880	1000	1240	1440	640	560	1440	1960	1480	2880	2240
D23	7144	5379	8107	5093	6295	2411	2853	9155	7048	11206	10178	1259	959	538	576	887	264	797	3011	3807	5905	3606	3427	3109	4577	1382	5799	2760	3640	2800	3120	2320	3440	2040	2320	3720	2520	2160	2640	3120	3320	2240	2440	1840	2800	3480	3280	4480	4920
E02	994035	1023751	1138217	577287	956072	673614	760285	310718	629450	701178	762224	577146	227276	244558	281601	301275	316674	294669	19758	549633	486698	79454	411057	519177	62343	356094	651858	54160	309120	339880	80720	114000	323040	110640	289360	372440	346240	349880	356480	254000	191600	343360	371520	332760	400480	416560	480280	487960	254920
E03	3814	4061	6174	413	2348	505	8318	7420	9930	29102	30567	6845	297	718	75	473	456	580	6483	2855	1094	6763	1111	2481	2836	3789	7196	2840	3480	3360	2600	2320	3720	2000	2960	3680	2600	2240	2120	2000	1160	2120	1800	1760	2400	4240	6000	4360	4520
E04	18593	8373	11935	8120	5217	8736	4180	6705	12765	7861	8358	1781	260	812	300	98	128	336	4167	1182	3671	3879	1158	704	2664	888	1042	1320	2480	1920	1400	1040	1920	800	1440	2840	960	680	560	480	360	840	840	560	680	1920	3320	1280	3600
E05	15154	8316	10421	11038	13442	9239	2602	3451	1648	11762	10445	2202	615	1818	384	355	459	505	7419	3707	4679	1982	1134	2395	6923	7151	11924	3200	1040	1080	2720	1080	1520	1760	1240	2640	400	840	960	480	560	1080	1160	840	1080	1200	2040	2160	6040
E06	25232	16759	21097	6618	8212	8125	8498	6857	9129	12915	17078	3936	602	1329	466	1270	1267	2700	6604	4970	6757	30097	34750	38118	4126	3176	6092	1160	2200	2800	1640	2320	1760	2920	3240	3480	880	480	840	480	2360	440	520	1040	1040	1800	1120	1320	1880
E07	11419	13363	10691	9378	6090	8109	3918	7459	3739	13866	13290	3107	2185	2740	1389	666	546	1179	2241	1102	854	6525	5322	9381	8839	8891	18565	3120	2240	3240	2320	1360	1360	1120	1480	2080	840	800	1000	1520	640	560	640	600	520	2200	2640	1640	1640
E08	9076	8080	7890	3975	2507	4640	10080	9667	6899	7676	6338	2501	1493	1606	903	703	787	106	8841	2498	2550	2037	1595	1661	9388	5702	11290	840	1200	2760	3480	1440	1240	1680	1320	1840	1040	1040	1000	1000	840	1040	1000	640	600	2680	1880	1120	4000
E09	1932	1730	3023	5708	6990	5424	11363	18477	10813	13885	15323	5124	1592	887	964	150	347	272	8633	5355	6150	13291	10688	12576	6118	14614	20595	1680	1560	1440	2720	2800	3160	1320	1120	1920	1080	600	280	1080	1000	1200	400	80	240	3440	2440	3240	7440
E10	6608	3953	4321	22848	18107	15937	3093	5947	4042	14557	16201	4127	4016	3662	3828	313	671	391	5059	1640	2520	3065	3334	4874	5324	18038	27301	3480	920	2600	1920	1520	1400	3080	1760	4800	400	1280	640	3160	3120	4240	360	600	800	1240	1480	1760	2480
E11	5238	5498	5181	15382	12570	8587	11320	12755	9082	14242	8730	3787	1409	731	294	631	668	830	1900	3545	2077	6797	5836	6903	17205	15232	25185	2160	400	520	2080	2160	1120	1560	1240	1640	760	360	960	1520	600	360	520	880	1040	2880	1800	3040	1640
E12	958	1016	884	423	999	630	9351	11399	14494	9373	10816	2703	451	698	340	456	459	490	11991	17380	13363	1153	1147	1890	3630	2620	4615	1200	1080	1280	1840	1080	1600	4320	3680	4200	760	400	440	520	360	840	520	960	640	1640	2280	920	2160
E13	8509	9540	6194	1794	1638	2076	2365	4974	5450	47656	44397	6562	1055	171	662	633	190	988	9836	9272	2610	2795	1917	2361	4136	4004	8346	2400	1280	1960	720	520	1160	2160	1320	1160	1040	320	800	720	720	600	560	840	1720	2560	2600	2400	2400
E14	11676	6361	10133	12340	8143	6287	6041	9866	7241	3117	3925	2967	1284	1816	1259	214	535	448	5130	4137	2628	46211	33937	37672	4844	4412	6119	400	640	280	1720	2040	1840	880	920	1840	1480	520	1120	720	280	720	520	960	720	3640	2160	2160	2640
E15	25888	27746	18210	1120	1607	863	2086	2071	2259	19448	17754	7022	4022	2974	1742	3022	3669	3901	4600	3054	3780	6217	3374	3061	6486	6897	6998	1200	1160	2160	3200	2400	2360	1920	760	1360	960	560	680	800	600	240	960	720	720	2400	2000	1800	4760
E16	4492	6771	5959	18193	12828	11488	6931	8652	8290	3660	5658	2227	1122	1090	1051	370	408	852	7666	5382	3901	8039	3219	5765	4998	4563	5953	3840	1320	1400	2960	2200	1440	1360	1480	1080	1440	1200	360	2000	1800	1760	560	1640	1840	3880	1920	1960	1800
E17	4509	1739	2027	15307	15739	13096	2653	2836	3106	6001	9577	2304	481	606	198	990	1790	425	37142	36300	34604	9168	3649	4162	5162	4609	6527	2400	2040	640	1040	1040	600	920	960	1280	1760	880	960	520	880	1200	1040	440	480	2040	2480	2800	1160
E18	8916	9595	7914	1310	1912	685	7862	13671	10382	11762	11623	2812	1737	1848	1926	61	542	113	4754	2357	2279	6155	14974	11923	5742	3427	9101	2360	2040	1840	2280	1800	1240	1480	1240	3120	720	440	960	960	560	640	1880	520	1080	4000	2720	2120	3920
E19	802	938	1088	9644	9829	6793	9802	11066	12692	11683	9274	2895	135	56	173	2181	423	506	6228	7227	9818	1275	942	560	5805	2581	7599	2440	1520	2120	600	520	960	2320	1960	1240	640	1320	840	1440	1400	1520	1480	880	920	3240	2520	2360	1120
E20	2083	1801	2081	4895	7075	5054	4672	6654	12145	5184	3111	1101	612	261	425	855	730	784	7267	4957	7820	4141	4908	5552	6549	3992	4703	3000	2040	1080	2200	1840	1560	960	880	840	1040	1200	800	520	2080	1360	760	720	760	3360	2280	1840	4720
E21	1989	1291	908	6732	6700	8711	5004	11608	10281	15250	11870	3470	381	108	303	1508	2308	668	7259	6884	11959	10871	5398	7671	4528	4701	6871	1760	1440	3000	3600	3360	2840	1560	1480	1240	760	640	1200	120	400	520	1680	200	400	2640	1640	2560	4120
E22	4827	4128	5479	10400	13427	7033	8756	9295	12853	7418	4903	1256	549	189	470	546	701	628	6427	3559	4077	2837	1978	4716	5041	3233	5502	2160	1360	2200	3280	1440	1720	2520	1600	1200	640	1880	840	880	1760	520	960	760	720	3160	2680	2520	1520
E23	10916	6188	8936	9138	5547	2339	8624	8023	6486	8275	7699	1036	611	822	741	297	299	778	7325	5646	9261	4448	2487	4465	5381	2101	7080	1800	1120	1040	1880	1400	1480	1320	1080	1280	760	1080	1160	1160	1120	840	480	480	680	2040	1120	3600	2320
F02	8951	6783	8393	7105	7937	5863	11052	5498	8553	15689	10906	1897	1258	682	79	840	146	995	3422	5259	3199	4064	4183	5813	3242	4198	5608	1400	2120	3200	2120	2000	3600	1520	2880	2840	2040	1840	3040	2080	1160	2440	2040	1640	2480	4360	4760	4760	3360
F03	733	1290	830	10936	8898	6427	10455	9347	10571	16175	19773	3159	564	476	680	1687	3559	2645	2132	1305	2632	4980	928	181	5878	3425	6951	1640	1200	1280	2240	1640	1320	2080	1680	1760	760	400	680	1640	840	1000	720	1040	1040	1520	3400	2320	3040
F04	324	315	249	10172	8782	5840	4959	9686	6522	113866	122799	30983	1466	666	25	1106	2815	1058	4890	5921	6348	9258	7597	7752	3604	2831	7559	1520	1040	2440	1480	1240	1560	1440	1480	2160	1440	480	240	1440	800	800	840	1200	680	3200	2000	1800	2800
F05	13578	12862	12265	4750	5792	4047	1221	2642	2829	16839	13026	3263	1176	822	1234	310	496	828	2839	1220	1008	4059	3276	4396	1990	1557	2216	4200	6640	5720	1160	840	2120	2360	1680	4680	400	880	840	1160	1920	1840	1040	960	960	1520	1880	2360	1840
F06	8170	7424	4896	11823	13997	10886	2902	4885	6804	15462	8588	2060	1705	225	587	189	787	455	3233	3993	3077	1241	866	1061	2910	1516	1988	1440	1360	2920	2240	1440	1640	920	1560	1200	480	320	600	1320	920	1000	760	840	1720	1640	2040	1240	1920
F07	3902	2697	4365	1466	747	2596	13346	17402	16510	34759	37546	8077	318	314	441	58	183	379	10620	6691	12666	2341	2969	2367	4295	6782	12471	2360	1760	1120	1360	1040	1280	1240	880	2160	480	680	520	440	320	440	640	1400	1360	2120	1440	2240	2680
F08	1953	2216	1785	8964	7716	5320	7336	5658	9311	2921	2306	292	452	379	140	1909	587	471	2610	6254	4353	4530	5179	6036	2728	2650	3394	3720	1560	1480	800	680	1520	800	560	1240	640	400	1240	2400	800	1440	720	760	960	1600	2680	2480	1120
F09	6797	5344	8557	19726	12850	8391	13597	19311	14541	29055	21647	4282	1694	347	790	585	552	353	5069	8703	6204	2261	2305	6969	1857	411	1881	2120	1040	1800	1440	1000	1040	1360	680	920	800	520	1640	1400	720	880	680	280	880	2920	1800	1600	880
F10	9395	5136	9323	20532	17891	12765	27845	42858	40407	10116	7856	3083	606	254	131	152	386	311	4883	3003	3810	4996	5807	6891	9407	12030	20754	2920	1120	480	2080	1440	2480	960	720	880	360	560	360	920	880	840	640	400	1680	1480	3280	1720	1080
F11	1038	452	249	6605	11318	8728	3392	2832	4356	33157	27383	12694	248	258	267	505	389	667	8864	6188	1739	1793	2108	2226	641	539	527	2160	440	1440	1720	2480	2000	1600	1600	1440	640	720	200	440	520	400	680	240	800	3120	2280	2200	1640
F12	7347	3243	4956	1935	2757	2029	9071	10686	9028	6200	8265	1647	1632	1886	1333	673	391	989	8119	9971	6107	3198	2973	1596	4946	2037	1964	1160	1080	1400	1680	1200	1800	1680	1400	1640	720	560	440	560	880	440	360	760	880	3600	2560	1840	1240
F13	14626	15835	16868	15725	17520	13616	6593	6843	5640	3811	2577	1602	2013	2347	1305	140	112	541	5614	1141	606	5126	4116	6881	4244	3285	6558	4280	2560	5600	1720	840	1280	1560	2400	2840	1120	320	1080	1440	1000	640	600	1200	1360	1560	800	1360	600
F14	44701	49685	45859	3266	4301	2185	22757	28793	19102	21364	14490	4311	726	129	381	988	472	667	5509	3908	2884	16830	12142	18323	5816	4069	10751	1160	1800	2120	2000	2280	1360	1520	2720	4880	920	640	320	760	920	1400	560	680	280	1800	1520	1280	1160
F15	3341	2915	2386	10023	9017	6179	7449	9390	9418	7218	4740	1039	520	258	425	608	254	245	5726	1097	1713	2150	1417	1490	5521	4408	7303	1720	1240	1320	1000	1360	1440	1640	2200	2240	1040	880	560	1720	760	560	1120	800	560	1440	1720	1920	1600
F16	6779	6049	5736	10347	6558	7630	9922	13298	16033	3084	4439	1145	243	251	204	589	152	587	8233	5886	6775	5266	2835	3780	4617	4282	7124	3000	1040	2800	2240	1040	1080	2560	1920	1520	880	720	360	320	840	480	240	480	240	4360	3640	5080	3760
F17	260	155	848	8043	12143	7566	7424	7737	6130	11311	11668	3824	4013	3004	4318	786	621	1070	6278	3788	2603	6851	4382	3858	4178	7066	6627	3400	1360	2440	3720	2960	1880	1640	1560	3440	520	240	480	640	1600	880	1080	1320	1000	2640	800	1160	2320
F18	1248	717	1366	7569	8152	6118	3852	6659	4559	20045	17450	2115	3039	4445	5317	191	905	230	6450	4289	3113	5813	2504	732	4493	4447	8842	2240	1360	840	5320	3760	1160	1720	920	2080	680	960	480	960	1320	880	200	440	400	1800	1520	1800	1240
F19	5508	7065	5387	4940	3572	2894	2660	2956	3619	10766	19569	4494	1154	1009	1011	258	697	342	8112	7423	6201	8721	10563	8436	4519	4749	6295	1360	1520	2200	1040	800	1280	1520	2120	1000	560	600	920	760	680	1280	800	600	1800	1280	2240	1320	800
F20	2738	3448	3695	16650	10803	11812	8220	8223	6245	14599	13175	3154	1939	2852	1722	544	1624	1096	7308	4395	6160	16747	14639	19560	6692	4502	11153	2840	1520	1400	1640	2160	1520	1000	1000	1000	640	680	640	1160	800	400	800	1080	1600	1440	1200	1680	2440
F21	244	1449	1590	8060	4656	5428	11783	14620	11925	21667	16063	4474	1293	978	1423	383	328	105	4790	7739	5588	5421	2800	2650	4806	4776	6161	2320	1600	1560	3160	1680	920	2560	1320	2200	1080	320	560	320	360	600	960	440	560	2080	1320	2240	3240
F22	2690	2862	3869	9168	8470	4795	19323	22795	33741	10821	11150	3851	735	621	499	227	347	269	5604	3579	3390	9424	7794	5731	4844	4353	9939	920	1840	1240	3040	1480	1080	1960	760	1920	320	680	480	1720	480	1400	440	880	680	2160	2600	2840	2280
F23	5399	8905	6733	6131	7707	5120	8599	10118	10951	13474	13005	3736	1940	737	500	941	943	699	3338	3028	4202	3516	5157	5551	5670	2889	6341	2760	1600	2120	2760	2840	1640	2080	3160	1600	680	640	320	1280	760	1760	1200	720	1000	1800	1200	1520	1080
G02	5383	5510	5490	7483	8630	3218	8268	2044	12204	10557	8035	2657	415	566	249	943	704	377	2653	2755	2753	5006	3493	6465	3413	2370	5141	3280	1000	1800	2440	1720	2360	1000	1640	1840	640	360	160	280	120	440	280	760	760	1960	3400	2360	1360
G03	1998	4255	2880	15980	24451	11237	6765	4222	8300	10737	12136	4421	948	3151	3912	179	452	421	4287	4170	6975	3989	2717	3179	18637	24009	31605	3520	1600	1080	1520	1600	2440	1440	1200	1680	800	720	560	1200	480	520	840	440	1520	2200	3240	2240	1920
G04	9215	6782	8789	9138	10788	8887	19921	15602	16211	30526	20543	8366	421	253	377	428	296	104	3018	2830	1519	5023	1970	2893	2675	2501	3540	2880	1280	1960	2000	1480	1800	800	1040	1240	840	560	560	520	920	600	680	720	1400	3280	2160	2400	3520
G05	758	665	464	33254	44213	22790	12495	15745	14291	9782	11541	3632	543	550	69	153	148	108	6044	11500	13193	5037	4949	10498	2522	3097	4077	2000	840	1520	1600	1280	1000	2320	3040	2480	1040	400	440	880	720	1480	960	520	1920	1920	3040	3200	3240
G06	34554	27970	24005	10915	13452	12201	8648	7673	6404	2059	5241	2456	564	86	47	271	265	627	2520	2498	1414	6373	4735	8845	5452	17891	17022	3480	800	1040	3160	2000	3600	1320	1960	3440	800	360	560	680	920	880	480	720	1120	3680	2480	3480	4520
G07	2334	2006	2516	7862	10107	11976	1539	1784	2227	9773	5604	1939	3099	4868	4907	1234	1031	1589	2187	858	1027	4894	875	3263	4102	4048	5701	920	1280	1440	2800	1360	2000	1520	1040	2000	840	200	800	1000	1040	720	2240	880	880	3640	3040	3760	2240
G08	2876	2279	3277	9532	5551	5498	17288	14504	13490	14330	15814	4460	1363	1478	1405	659	828	746	2235	974	1198	5541	3840	3631	4176	6566	10875	2000	1360	1400	2920	1360	2000	1760	1560	1480	720	440	720	1440	520	840	400	200	480	3160	1720	1320	1440
G09	1242	671	366	6231	8328	6422	11030	13149	14205	19149	14940	5177	1859	784	502	391	145	190	7004	9582	6180	2048	2437	1452	7214	4492	4920	1640	1280	2160	5160	3080	2320	1440	1200	2400	960	280	560	1560	1800	1640	560	880	1160	3240	2360	2800	1520
G10	440	1421	363	5553	5362	8758	6633	17446	17527	24366	25199	7044	90	346	311	70	833	234	1729	4058	1673	7620	4926	5127	4652	3747	6339	2040	1240	1080	1920	1480	1000	1520	1000	920	1920	520	1080	480	1000	720	400	1000	1360	4720	3760	4000	2400
G11	6855	5270	7366	18274	16957	10550	3416	6871	6639	11567	5552	2936	1994	1055	534	1195	466	230	9121	14089	13254	7638	9061	8544	4116	3084	8098	3520	2960	1880	1800	1960	2640	2960	1720	3160	760	720	560	640	520	1120	1360	720	1240	2560	2280	1920	2400
G12	13817	17512	18088	9990	6172	7419	3321	5762	5672	10204	11559	3227	5920	2840	2944	58	552	222	2132	1613	741	6259	4330	3658	687	821	1189	3080	1480	2400	2040	2680	2960	1800	1080	1720	1240	840	280	1400	480	1520	640	760	1560	2840	1760	3440	4000
G13	13657	10077	9551	5655	5054	4526	2672	4931	9045	1537	1416	1268	1297	114	251	1349	430	827	2336	1556	1491	4149	4811	5812	5732	3209	7745	1480	1480	2000	1280	1560	2280	2200	2280	4080	840	600	680	520	920	1160	920	600	760	1680	1880	3040	1640
G14	962	1211	1742	7474	4523	5249	15900	17498	23435	12559	7401	3008	2132	1071	389	1082	375	1007	6624	2476	1193	5591	6646	3487	3753	4029	9901	1160	1160	1960	2080	1080	640	1320	2240	1640	400	680	680	560	280	760	600	440	600	1200	2200	2080	1400
G15	5261	3842	4624	8962	5169	6963	6268	7503	9134	10124	9958	2035	2089	583	226	1107	432	1149	9054	12750	16665	8821	6884	8570	4183	4629	6549	2520	2360	920	1960	1160	1920	2000	760	1000	600	80	560	680	200	360	840	360	1440	2280	880	2640	2160
G16	641	867	274	8897	9302	4936	6027	6322	5366	4970	6043	2659	852	863	583	106	71	186	2458	2214	2631	6477	5894	6423	3546	4830	7717	760	640	1440	1400	1520	720	1400	840	1520	1360	280	560	480	1080	1000	760	800	1000	3080	1600	1840	1760
G17	12417	13858	10767	1739	876	499	7543	9523	10062	15052	13179	4299	890	1052	1729	711	628	588	5947	5968	5395	6172	8289	9242	3831	3167	8174	2360	1160	1120	1880	800	1280	1720	880	600	1360	880	640	440	920	760	480	1120	440	4000	3040	3320	1760
G18	5236	5116	6151	4954	4765	2998	8309	7589	8216	14773	12246	3934	308	251	354	388	784	185	7179	5843	4007	4337	1591	2242	4427	4786	5884	1080	1520	760	1920	2000	2720	2360	1440	2400	480	560	640	1040	360	1080	320	680	1640	2200	1680	2320	920
G19	4179	4454	3029	12528	11797	15735	10023	9919	15456	8774	7263	3366	3186	5334	5208	982	1212	1409	2712	1222	2037	4482	2502	1098	4469	4584	5310	2320	1000	2040	1880	1040	920	2320	1880	1800	1320	360	880	1400	1000	760	80	240	1320	2520	2440	1960	5880
G20	3023	2353	2319	8277	5123	5429	5504	6966	6597	70062	80709	12522	637	2630	3916	1386	1093	2981	3296	2141	1521	5119	3110	4450	3251	3772	5066	1360	2000	2160	1880	1360	1720	1640	560	800	640	680	840	1040	560	760	360	840	720	2280	2720	2800	4360
G21	5996	4838	7270	6475	6830	5389	6096	10806	13064	10406	8397	4754	1688	239	460	706	1549	579	2813	2816	1847	2181	764	990	4101	4987	7578	3960	2480	760	1880	1560	960	2280	1120	880	720	440	520	1280	920	1680	520	880	880	1800	1640	1480	6320
G22	1663	2719	2063	9242	4137	4420	5767	9266	2613	10409	10262	2675	597	1381	1347	490	367	410	5959	10793	9052	5022	5276	6390	5075	4402	6808	2360	2000	1240	2520	1360	1480	2160	1000	1480	1280	720	680	960	1600	1520	1040	1000	720	3560	1800	1960	1160
G23	9630	9666	8376	4460	6390	3866	4787	9324	8007	12782	12064	3654	641	947	494	1182	577	838	2814	4526	5524	5821	2564	3128	3500	3869	4844	2680	2240	2840	2160	3400	2360	3120	2960	3840	3200	2200	2440	3000	2720	2760	2480	2280	2800	4840	4360	4040	4920
H02	7987	6300	9213	8750	7092	4567	7544	8342	6399	12733	8976	1498	1024	791	76	383	508	953	4130	2724	2578	4696	2705	5007	4019	4019	5645	1080	1960	1120	2040	1040	1640	2640	1040	2080	600	1240	960	720	1040	280	1080	440	1560	2200	2560	2080	2640
H03	13255	12042	13100	4077	4707	3088	90015	84153	79726	24280	26037	3039	661	134	54	709	347	304	5113	5300	4480	976	1044	1055	2383	3781	4034	2240	1440	1480	1800	1720	1720	1120	480	1120	760	440	880	560	400	680	1240	680	560	2080	2240	2200	3880
H04	29494	26188	33775	1758	3620	1803	7244	9113	8897	7671	7278	2977	417	427	32	629	830	1232	2983	1627	2321	6095	4269	4566	4727	2205	3442	1920	1080	2120	1960	1360	1280	2680	1040	3240	880	680	800	800	920	1080	1120	320	720	1680	2240	1880	2320
H05	7597	5282	7928	7407	9241	4613	256455	243920	167324	9630	5869	1229	825	591	317	233	990	629	5073	3829	4012	6355	13425	23501	3521	3601	6063	1680	1480	2040	2600	1360	1720	360	1720	2680	320	560	1280	1280	1280	760	1240	920	1440	3520	3120	3080	2000
H06	2729	1268	4382	5294	8413	4251	6360	3511	8473	10871	9057	3562	1137	392	314	75	670	190	2597	1876	1610	7628	4490	5168	2384	3128	5171	960	1800	1520	2640	1960	2120	1640	720	1200	1320	600	760	1240	1080	960	400	960	560	3720	2480	2280	1480
H07	21048	16379	19476	9526	10528	4985	72698	93088	102787	17911	12388	3052	1451	58	352	108	387	223	1207	718	1236	4468	3572	2361	3444	3295	6033	2560	1360	1640	2760	2320	2040	1800	2320	2360	1000	400	800	680	200	1080	1080	560	600	2640	1720	2400	640
H08	1570	1819	2434	2907	3877	1520	5708	9081	6491	7977	9078	3033	1132	1461	665	234	389	270	3138	2080	2892	6042	5749	5053	4526	1687	648	1320	2040	1000	1280	1160	1080	2400	1840	2600	680	320	720	1760	480	1320	320	1000	720	2560	2320	1680	2080
H09	10930	6753	8048	2213	2938	1759	13766	14389	17055	27104	26772	2579	529	579	628	234	473	472	4290	18010	15897	4368	3510	3394	666	1149	1999	2000	1400	1320	1280	680	1160	2720	1640	1800	920	320	480	2480	2320	1840	800	1000	1120	2120	1120	920	1480
H10	3793	6372	3667	6045	6444	6163	30536	36372	52247	14098	13598	2033	929	290	321	74	267	311	5850	5654	6561	2911	2898	3093	5759	4074	5767	1960	1240	1440	2240	2200	1680	2000	2960	3880	1120	720	1080	880	1040	1440	480	600	1080	5040	3360	2640	2560
H11	3213	3693	1414	6915	5664	5126	11630	10227	14389	9578	8847	2852	1843	1046	1109	148	673	668	8290	7531	7169	5998	6049	5920	1479	874	2295	600	1720	1360	1560	1240	1160	4080	2880	4760	640	480	320	3200	3360	3360	760	840	440	1720	1480	1160	1920
H12	4630	3888	4980	11460	8534	7741	5776	5364	4916	15077	12886	3384	2094	4118	647	754	67	1111	6821	7801	4092	2851	2630	2108	5458	2066	5579	1120	1560	480	2720	1360	1760	2880	1360	1280	1360	1080	760	1120	1560	920	480	600	680	2880	2840	3160	1080
H13	9850	8345	7236	6990	4996	8407	3926	3144	6932	5441	3648	1324	1252	1969	583	489	576	408	3842	2275	2347	6138	4238	5012	3116	4442	6115	1240	1600	1280	920	1080	1160	1160	760	1360	1040	360	800	560	120	240	560	760	1320	2760	2040	1200	1720
H14	7808	6149	7645	4134	5924	5746	14543	12532	13203	9926	9710	5279	766	615	1105	10623	10413	17742	7330	3980	1710	7369	3402	1689	6992	4271	6723	1440	1440	920	2680	1640	1240	2520	2240	3840	400	960	680	480	1040	840	640	680	960	2480	1720	2040	2520
H15	9249	12936	9351	8483	3668	3972	8012	12042	8616	2467	2796	1081	1970	780	1140	289	494	290	3819	2705	3837	10290	6527	7796	4199	2903	5313	2080	1600	1920	1360	880	1280	960	720	480	400	440	1040	240	600	480	280	680	1280	6280	6000	5960	1320
H16	235837	209938	233095	9474	10425	9260	21403	26340	28103	12840	14817	3393	1693	1017	740	115	309	149	1926	1431	1517	8638	8063	10000	3988	3874	7009	1800	600	1000	2040	1680	1560	960	920	680	1360	440	1080	1080	1120	560	840	680	2400	1680	1680	1840	2120
H17	2131	2161	2786	2871	2792	2256	9386	12921	11459	1884	1885	453	131	856	207	232	710	752	7471	7937	5616	1339	593	1096	3672	3468	5482	2640	1560	1200	880	880	1080	1160	1080	1800	1160	960	960	1200	880	600	720	1360	1640	760	1360	1240	1680
H18	10651	9536	14440	7444	6374	6545	8442	10650	9144	9981	9721	1762	2271	1540	3271	305	96	456	2643	2058	2283	1675	2366	2639	3591	4345	5343	1400	3120	1720	1440	2400	2120	1600	1520	1280	1200	800	760	1640	600	680	720	1000	800	1240	720	1320	2360
H19	4014	4065	2090	30313	29781	14204	51164	68759	71879	23922	27253	6673	279	637	185	1141	2343	2102	4238	2120	2987	2654	2128	2850	3783	3694	5576	1760	2920	2640	2320	2280	1760	3160	920	3080	880	560	1120	1440	800	880	880	1800	1840	2320	1560	840	2880
H20	11244	9747	14554	7387	5459	4718	6306	4675	7764	10184	6225	2263	932	485	432	303	379	208	5472	1813	3860	5340	5189	5066	4031	5111	6935	1520	2120	960	1840	760	600	2840	1640	2760	840	480	440	1360	920	1160	440	280	680	2080	680	1480	3160
H21	24158	22303	38658	10492	8622	7717	16736	10519	16806	32954	44349	9776	3161	2307	4036	210	91	137	4796	4886	3733	1731	2153	2302	4408	3368	7038	1320	2760	1720	2000	1520	1320	2080	1160	1760	1160	520	560	600	1000	920	880	760	840	2040	1680	2720	1560
H22	2200	953	1970	22014	26405	12075	4967	10762	7787	33440	35026	18943	1458	5243	4225	58	17	77	12608	13963	17527	2346	130	1137	5404	3366	5909	3600	2320	3200	1880	2800	2280	3360	2800	2640	2520	1840	2560	3320	2480	2880	2920	2080	2760	4640	6280	6240	4960
H23	1007816	938950	900041	682748	575760	557298	566722	536508	621444	818142	673725	497395	286707	325803	335847	291278	314038	332154	444001	447934	484972	443483	336153	449820	405281	407100	535931	400920	333000	379160	81960	321680	367520	428800	324280	419640	382440	322320	436720	480800	381680	439120	417400	413200	413040	496560	516760	518600	487240
I02	12031	7149	7273	11354	12797	6351	12610	10698	16183	19711	12659	5250	1693	821	302	1425	1061	459	4562	5424	3617	5233	5216	5342	4757	4376	10887	2520	720	2360	3240	2280	2840	1560	2920	1960	680	800	1000	1040	800	480	960	1760	1120	2360	1320	2920	1920
I03	7663	5723	7820	2340	2804	2358	7744	4552	7879	32357	35759	12743	974	225	674	768	501	259	4041	1954	2370	3619	3631	5737	4429	1847	3334	1440	1200	1360	1920	1520	1400	1600	2040	2400	120	440	600	680	240	600	360	480	1160	2840	1800	2960	3120
I04	9853	6172	2632	7590	6345	3737	8733	11667	7906	14969	18443	5444	2184	1311	551	665	189	386	3912	4445	3851	6258	14073	14453	4144	3204	7100	2120	2440	1320	2720	1640	2320	2200	920	1600	960	480	960	560	960	880	360	560	1280	2160	2320	2760	520
I05	9812	6714	9602	30202	36987	26163	7515	8153	13045	15624	16445	5895	615	222	147	313	151	392	3690	1212	2190	3424	2775	3948	4330	5275	4166	1960	1280	960	2160	1800	2560	1960	2200	2400	880	1240	1080	760	680	880	1040	480	1720	2160	2080	1160	1920
I06	21583	17231	16358	4680	6429	4173	9144	11185	13598	14337	8686	7033	1066	572	300	189	149	220	5931	7791	5676	6163	4940	6602	4656	2404	4646	1720	1800	1400	2440	1320	1720	1440	1360	2080	480	1160	720	1240	1160	1160	480	560	1200	2040	2480	2120	6400
I07	5106	4873	4662	3926	4347	6124	8343	9000	10271	15110	13450	3350	7054	4426	2831	596	234	1074	5012	2500	2031	4917	7981	7558	2479	2269	3516	2400	1680	2000	3520	2840	1320	1680	1320	4000	400	640	960	3160	1280	2360	560	560	760	3280	3280	2880	1120
I08	6583	7106	6181	9537	9789	8848	6236	7306	8456	15846	16701	5310	1535	1153	253	111	351	308	3166	1632	910	6505	5149	2264	4732	9196	15358	1160	2080	2240	2720	2280	2520	1480	1960	1200	1040	760	800	1080	800	1520	360	480	920	3640	2200	2800	3480
I09	5360	6290	5953	10604	6339	7191	15526	14115	16729	46812	38164	7661	1607	1194	512	313	471	630	3462	1897	2376	8817	4798	5598	6505	5856	9906	2480	1400	640	2000	1680	2560	2560	2000	1880	560	400	440	1360	680	2080	760	680	560	3680	3120	2280	23840
I10	7915	7231	6677	5237	6155	4969	6881	11943	12680	6415	3396	2944	3096	3306	4911	675	271	268	5077	3491	3465	4800	3603	4496	7376	9385	16395	2120	2440	3320	3840	3240	3200	2560	3960	7360	480	520	1080	960	520	600	760	840	720	2520	1760	2400	720
I11	3583	3348	2649	7981	6668	2990	26532	25211	23980	12839	9181	3695	1434	604	434	105	419	457	4900	6155	3123	8208	5213	7608	6380	6066	13574	1680	2240	1600	3400	2120	4120	2160	3040	2960	1680	640	600	2800	3240	4440	480	600	760	2720	2480	2360	4440
I12	3261	4847	5427	8036	8972	3724	6265	8086	8865	3266	3066	2386	2813	1682	1226	272	393	107	3070	2359	1594	903	1328	1680	5539	3319	7974	2280	600	880	1320	1720	2720	2040	1360	7360	480	680	520	400	400	720	360	920	1200	2520	1480	2360	4920
I13	7641	3647	6732	1577	2358	1793	4151	8238	5858	15773	9971	3521	649	611	1063	149	614	544	4398	1830	2162	3596	3570	2329	3978	4170	9295	2080	1440	1040	4080	3280	3320	2640	1000	2040	360	640	520	520	160	560	920	1520	840	1800	2200	1320	1080
I14	5236	6609	7638	9286	6563	5647	17767	14761	17484	6244	8558	1635	654	531	613	974	3213	1172	5096	2861	1266	4699	3574	3423	4359	4461	6379	2680	1320	1560	1920	1120	1320	1800	1400	1680	280	800	560	1120	600	240	600	640	480	1800	2120	1600	2720
I15	2541	1100	1888	81090	64383	52669	12578	10234	10944	26711	30888	10567	848	1381	1418	947	654	826	6780	13172	9424	1779	1535	1568	6465	4353	9330	2040	1800	1560	1160	2400	2040	1600	1880	1040	1200	480	720	400	240	240	720	680	1840	3120	3000	1840	5000
I16	4651	4668	8327	347961	238793	215589	11189	7317	5330	11382	6797	3936	1902	1662	1543	230	545	590	6379	2829	2418	10635	11239	13186	4883	3982	8093	1360	1640	480	2760	1720	1760	880	1680	2640	1120	320	440	1080	1560	2920	2000	2280	1760	800	1120	1240	7320
I17	5065	3524	3068	14550	9385	6935	7624	10045	6139	3296	3166	2308	342	575	103	230	668	141	5083	1456	2053	8502	3772	3791	4190	4951	7409	2320	1880	1200	1880	2400	1240	2960	1320	2280	480	1280	1240	1000	1640	1000	920	1200	1480	4720	4920	5760	600
I18	151243	136066	131837	18400	17409	11539	9773	9548	4606	63256	80686	17327	734	1705	695	986	508	1228	1981	2389	1020	6530	8822	8172	3780	4776	7197	1360	1520	1600	3360	2120	3080	2960	1760	2840	560	520	880	2160	1320	1760	120	280	200	2400	1880	2920	2240
I19	5447	5902	7548	1665	513	684	1712	1892	1865	18551	14679	7696	941	337	950	1819	1340	1058	3517	1779	1226	6990	2407	3063	5032	4778	7847	2400	1000	2760	2520	2360	2560	4720	3320	2400	880	800	640	240	360	600	600	200	560	2000	1480	1520	1960
I20	10845	9275	7875	3071	2943	1423	8109	8204	11711	12247	8618	2625	776	585	425	166	172	458	3135	2649	2228	8077	8606	7015	4173	4816	7978	1640	2760	1720	3000	1800	1400	2440	2000	1560	800	1160	1400	320	720	520	1880	1160	1320	2600	1480	1560	8960
I21	3511	3328	2999	8076	4320	3866	4471	6015	9071	19926	18505	4073	1235	1646	801	2667	1552	1310	5896	6351	7472	7037	7468	7759	4183	4305	5309	2160	1960	2200	2880	2360	1560	1520	2400	1560	720	480	920	1480	1880	1760	880	1440	1560	2800	1520	3200	4520
I22	8692	7268	5623	3760	3444	2988	9947	14596	12346	13179	11363	6649	3117	2935	1743	1524	929	848	6611	5940	14460	845	1843	1590	4030	3622	9308	2440	1680	1800	2760	1200	1440	2720	2160	3080	1000	640	1520	1800	1640	1160	440	840	720	2720	2320	3320	2440
I23	6175	6130	5502	4170	5299	4834	6141	6280	6084	11224	9308	3637	1234	620	1010	137	255	278	3805	5434	7409	3488	5909	4356	4074	1870	4767	3960	3760	3040	2320	3880	2960	3640	2160	4080	2760	2840	2800	3240	3440	2840	3040	2880	3360	4280	5240	4360	4760
J02	9007	6522	7092	7962	7393	5042	6441	8924	12059	16487	11936	2082	1439	764	781	521	672	683	5292	2256	3715	4748	2604	3910	4044	2501	7271	1240	3320	2400	3920	3280	2760	2880	3120	4040	2200	2080	2680	2200	1880	2440	1920	1720	2520	3000	4280	4520	3520
J03	3106	2258	1309	1664	3608	1257	35611	46292	47443	26816	21063	3187	125	330	89	2976	1732	2571	333	132	469	5454	2769	4653	4642	1451	3855	1120	2680	2160	3720	1440	1760	1600	1760	2040	280	440	1120	840	680	640	1120	840	680	1240	2080	1920	1480
J04	7800	9279	7734	3208	2073	2401	13741	11877	12134	20854	18329	6182	776	780	787	1005	377	532	4929	8504	5266	4875	4322	4302	3521	3808	6327	1000	1080	1560	1960	1920	1880	1640	880	1880	880	1280	680	880	1080	800	320	480	840	1400	1400	2160	1840
J05	1264	552	644	7754	7912	7645	15326	16025	19281	13319	8266	4944	376	652	1057	145	229	100	4541	3080	2418	5256	7681	7568	7196	20344	31294	1040	880	1160	1560	1640	1880	2560	2280	2360	840	1080	600	1680	760	840	840	840	1160	1280	1400	1120	3760
J06	13252	9639	9719	3446	2284	3986	5336	6698	8254	19456	9812	2559	892	65	304	1075	955	1956	8105	2997	1861	11897	23979	25689	2074	2491	6912	2280	600	1200	2360	1880	2640	1160	680	1280	1880	560	600	1160	1120	1000	920	640	2080	2160	1880	1640	6960
J07	3562	3567	4160	3479	3763	2366	8408	3423	6163	2956	2776	526	379	519	533	264	144	258	1629	594	805	4611	3547	2890	1523	1327	3157	2640	1640	2000	3640	2400	2880	1960	1000	720	560	840	1200	880	1080	1200	600	640	1240	2640	2160	2440	2560
J08	4562	3280	3980	14786	15566	12020	13070	12031	12323	7171	6558	1840	1823	1291	777	396	433	110	1419	1707	1240	4232	4808	6093	5794	4920	7178	2440	920	1680	2840	1600	1200	1680	1840	2000	1480	480	840	1040	360	1920	400	680	800	3560	2040	2480	840
J09	10399	12783	16035	32266	20502	21756	14226	16629	16516	25969	23010	6660	7969	3261	2907	153	509	789	19357	16849	12811	9647	9393	11385	3927	5846	11616	3600	1280	2320	3120	1960	1800	760	360	1240	1520	760	480	640	720	920	1040	920	1200	2280	1920	1480	1720
J10	9287	6633	9399	4010	9719	3181	5756	5895	7077	16350	11010	3549	173	238	268	386	342	656	7477	5378	4532	8663	7910	9299	7105	8078	7049	2480	3400	3240	1840	2280	1360	1280	1720	1800	1040	640	440	360	1320	680	1040	960	840	3000	2800	2280	2080
J11	9894	7751	6207	4318	2446	2145	15211	9835	16693	8550	8728	3313	501	425	1071	1595	2432	3151	1124	1372	1241	898	762	495	3280	3072	6295	1680	1840	1600	1200	1160	800	1120	3040	3680	640	520	680	1160	680	560	760	1000	200	2120	1400	920	840
J12	1385	1650	1939	285	1085	522	8856	9985	10395	15673	12753	6097	449	1501	344	303	100	130	7121	5895	5951	2579	1372	2036	2140	1977	4699	2440	1120	2520	1480	1680	1680	2080	840	2960	880	840	1040	800	600	680	920	800	520	2840	3080	1760	2040
J13	9922	7370	6009	7947	7919	4587	9203	9793	13358	53905	61397	15832	739	932	545	75	353	952	2315	1184	1437	3130	3311	2458	4948	7309	5153	2000	1400	640	2400	1800	1840	1080	1720	880	640	320	720	1200	1000	680	1080	800	1360	1600	2920	1520	1000
J14	11160	15831	12387	10887	11839	9188	2491	3905	4231	10837	6498	2844	2296	2542	1150	225	417	386	7228	5884	3468	4958	2899	4299	4065	4805	6795	1360	1600	1680	2080	1120	640	880	1520	1080	560	720	440	920	920	680	680	760	1000	2600	2160	3480	280
J15	2903	5622	6385	5610	4888	6277	9540	9537	6719	16346	15305	6168	1178	334	535	626	303	307	2267	3199	2071	6689	11896	9994	3202	4026	6704	2440	880	800	1600	2320	2000	1280	1440	1560	680	1320	760	520	800	720	440	520	640	3680	3000	1600	880
J16	6763	3592	5517	110930	70730	58402	10170	3678	3001	9704	8150	2165	155	149	783	431	1110	588	4003	7391	5219	3017	707	980	6225	4185	9565	3720	2360	3200	2440	2200	2280	760	800	1560	320	1360	520	1040	1120	1200	560	640	1400	1880	1560	2320	2360
J17	15318	13002	15546	6697	10020	5469	15118	11779	10552	42782	38915	9106	389	270	630	355	308	792	4960	5379	2785	5973	5732	7699	3525	3426	5811	1240	1760	1640	920	440	480	520	960	1120	920	640	1160	2280	1160	1080	1120	800	1320	2840	3080	3040	840
J18	3365	1868	1104	9660	8807	9642	7393	6974	9219	5824	4377	694	1024	180	150	104	71	465	6203	3528	4995	1649	1028	1576	4918	4343	8374	2120	1840	2400	1360	2200	1120	2400	1720	2560	680	240	480	680	1120	1040	560	360	400	3240	1400	1840	840
J19	5820	5290	4481	847	1162	539	11474	12046	15091	45947	34910	13567	1498	1185	427	1381	501	143	5248	3665	3290	63807	44091	64386	3851	4868	6282	2360	1440	2400	2200	1800	2080	1120	1160	1440	680	560	840	1160	1240	1440	1720	1800	840	3040	1880	1880	2920
J20	13479	9273	10368	12732	13762	7792	9827	6952	10139	5641	5601	2471	1038	214	483	1345	1832	1311	3787	2579	3785	1804	4631	2088	5829	4338	5054	1680	1160	3120	1920	2640	1720	3000	2720	1440	520	280	960	1600	800	1640	1880	1600	2040	1720	1520	1560	2640
J21	7928	9911	5375	4170	5912	4368	9749	6807	10664	11230	9060	3250	942	179	743	414	179	261	3718	2073	2111	3939	3679	3324	4409	5029	6023	2160	1760	1400	2280	1760	1280	1680	1200	480	600	640	2040	1120	1640	440	920	1360	840	1600	1200	2000	3920
J22	3044	2462	3592	8414	7090	3924	8858	7162	8041	8804	7568	2106	568	448	535	423	229	349	6646	1554	1580	2728	3601	4982	5021	3471	8663	2640	2520	960	2320	1800	1360	2040	1240	1480	320	440	1120	760	640	560	1040	520	680	2520	2240	2240	2400
J23	8541	7245	9433	6270	10449	4989	5462	5873	9345	10495	11103	2937	693	656	859	827	783	344	4189	2889	5294	2732	3987	5072	4156	3493	3438	1800	800	1600	2320	1040	1480	1200	800	2000	1040	360	760	1400	1520	1240	440	400	600	1480	2320	2600	2280
K02	967699	858418	1038216	601587	802479	672392	638737	376199	663351	711182	737013	606370	244475	273196	285359	147414	288118	307592	86629	526983	438183	454460	439775	490977	402336	525750	681517	65920	293560	332600	367280	361320	305360	326520	295680	438400	376360	380120	327960	251840	211320	362840	379760	308520	354960	375760	455800	449400	220680
K03	10227	8891	10935	4128	5938	1128	11959	9674	15856	19525	21855	3397	355	639	259	273	345	231	11127	8107	7429	7778	4360	6858	4579	5342	8349	2560	2440	3000	3000	3400	4360	2400	2360	3640	1920	2160	2080	1560	1880	2680	2400	2080	2920	6040	3800	4080	2400
K04	6349	4778	6188	2367	4185	1014	7742	5221	8475	5844	6840	3631	1493	1240	529	2503	1897	1978	3489	1946	2563	5052	3496	4906	12318	16553	20974	2320	1160	1080	2400	1120	2600	2440	2320	3320	600	840	400	680	1000	720	360	760	840	2320	1880	1680	2560
K05	7546	4252	7828	21579	24738	16768	27882	24227	22119	8246	7863	2437	1967	3857	2906	222	463	623	8002	8748	8878	5358	4439	7426	4789	4974	7638	1480	1000	480	4120	2720	2960	1400	2240	2720	560	520	520	840	480	400	1120	1720	1120	2320	3280	2120	2560
K06	6797	7015	7138	10955	9085	9266	6558	8451	7733	8599	5812	1878	3009	806	853	303	384	99	4557	3229	1526	2015	1293	2090	1951	2577	5187	4280	1120	1560	4000	2080	800	1120	1560	4080	920	720	520	1360	1840	1360	600	1160	1080	2640	2640	2000	5720
K07	4916	2049	2550	5864	5084	4944	14030	10303	10635	23181	24420	5262	1217	1508	909	831	1222	725	1600	704	921	5446	1496	1933	3339	3135	3835	2280	1320	1720	3320	2400	2480	2320	2480	7080	680	480	720	680	360	720	1480	920	800	2600	1680	1040	3400
K08	7485	5119	5741	7115	7527	6196	1011	2346	3633	9069	6751	1558	249	178	345	230	186	349	1004	4718	6923	1850	1463	2111	4975	4892	9576	3200	2040	1760	3040	3000	2640	3080	2000	4440	520	520	800	480	840	920	1000	480	800	4560	4520	2720	2480
K09	9231	7932	9764	8139	6988	6427	3182	5025	6875	64179	57037	4606	1784	575	615	117	674	632	9229	3264	3855	12797	12188	17422	624	1248	1094	1720	360	1200	2040	1040	1000	2120	800	1160	720	200	1000	1440	600	840	1160	760	1200	2680	1520	1280	2400
K10	6159	9141	6898	6509	6764	3127	43059	30308	18597	24050	26444	10347	537	470	550	76	70	151	3288	3571	1568	1496	1919	1203	2143	3294	6852	2320	1240	1320	1440	2080	3000	880	2120	2920	720	440	1040	1000	480	1120	440	600	1000	2680	1600	2600	2040
K11	4097	3663	5702	917	1849	2018	6212	9274	12763	6511	7773	1885	1221	270	389	101	530	203	8386	8946	7655	5962	6583	6933	5796	6626	14677	1640	1480	1640	2080	1200	960	800	1160	1440	640	280	440	640	440	720	840	1400	1960	2680	1760	2040	1800
K12	8140	6795	7504	94256	73450	68623	9134	10383	11706	6918	14115	4014	1540	370	61	1074	434	1275	7275	6446	4252	5577	6544	10092	3997	4640	5354	2600	1680	2960	1840	2040	1760	720	1480	920	920	240	520	800	480	560	520	1080	1440	1680	2080	1520	840
K13	7865	5396	5677	2445	5214	4111	4513	6850	7343	9372	5494	2882	377	302	114	148	74	266	3537	3430	3295	8451	7965	9294	6020	5005	8830	1240	1320	960	600	760	560	1360	1800	2800	360	600	520	480	400	800	720	1000	1200	1400	1440	840	1800
K14	2761	2988	3397	10193	8183	6016	33277	33097	35823	9785	11870	4250	1651	1334	97	868	110	31	6466	5946	4186	7119	6400	9345	4260	4696	11043	2320	1040	1520	2000	1520	1520	1440	1160	4000	1080	400	840	1320	720	920	360	720	680	1840	1400	2360	2160
K15	3751	3788	4073	962	617	563	6155	6866	9799	11835	13762	4363	516	390	950	948	911	592	5639	9587	12332	9749	5857	8127	4262	3213	5577	1640	1640	1440	2440	2920	2040	2640	1480	2560	440	800	1680	1280	1120	1560	840	1240	720	2120	2520	2240	720
K16	3675	5534	4686	3362	2589	1910	4946	7144	5467	3699	4842	1332	11937	14108	7575	307	584	390	7076	4164	3256	2208	2202	1403	5094	5319	6762	1800	2200	2200	1640	2240	2080	2600	1440	5240	1680	960	1040	640	960	840	1160	360	1040	880	1200	1200	2520
K17	4557	3012	5115	9421	5589	3955	10530	11189	11374	11009	11802	4065	322	628	588	71	269	149	5930	5425	4693	5400	6101	3644	5146	3223	8294	2640	800	1680	3480	3160	3560	1800	1160	2080	1200	760	400	1600	1640	840	720	680	880	2440	2040	1360	2600
K18	7335	6708	9867	5096	5109	2797	7695	6773	8908	2239	1077	662	183	423	70	153	276	434	8485	8573	8086	8678	8435	10690	3184	4121	6480	2160	1800	1440	2920	2280	1560	840	680	1320	680	520	1320	600	1480	560	1120	1240	2240	2240	1920	2000	2160
K19	649	660	345	32100	26655	14242	9959	10946	19003	6042	3609	1600	800	1970	725	184	105	224	6452	1797	2480	1004	3075	1222	3639	2867	6656	2040	1080	1400	1400	2080	2480	1960	1800	1920	1440	560	1680	1240	1520	2720	120	320	560	3760	2200	3880	3120
K20	11164	12518	16367	3239	3239	1871	8454	9957	8933	8737	10679	3452	4383	2611	5065	669	587	749	4340	2368	2099	2712	2808	3103	3534	3436	5675	1800	1880	1600	1960	4440	2200	2680	1000	1600	760	480	1320	1120	1320	840	880	880	720	3600	1760	1680	1480
K21	6516	7360	8433	4766	4777	4386	6865	6691	10732	45749	86466	18124	323	1410	1077	188	189	346	5341	5060	2986	5878	5486	5345	4664	3948	5185	2280	1960	1240	3120	1280	1400	2120	1480	1320	1120	560	640	2560	920	1280	1360	560	1040	1680	1520	1520	1080
K22	9685	7377	9435	11437	6716	8206	7207	7886	10196	13619	15844	3572	904	1816	1021	189	106	429	5623	4293	3039	12426	11569	14541	4804	3640	5490	3000	2320	1680	3120	2040	1720	3560	2040	2400	1440	800	680	1000	1400	840	680	720	1360	2680	2760	2760	2160
K23	9829	6515	8382	6699	4068	4298	6324	6054	6310	8229	10622	2714	1348	1295	226	148	711	393	3284	3057	7170	3204	5077	3745	3482	4215	5396	2040	1280	1600	3000	1280	1520	2240	1000	1880	800	440	1000	1360	1080	1160	680	1480	1800	3240	1720	2240	1280
L02	6713	5696	6763	6314	5159	2554	7432	8857	8778	8713	4987	976	1042	643	0	580	158	1012	5172	3128	4381	3253	2529	4467	1338	4656	6241	2120	2360	3200	3000	2200	3120	2320	2600	3760	1960	2080	2120	2280	2280	3080	2080	2240	2400	2400	4760	4160	4560
L03	9111	7901	7790	7950	11368	4241	19580	21470	29973	13903	12805	2550	852	493	99	378	610	727	1838	1381	2048	2028	2549	2641	4215	2268	4616	1920	920	1320	1640	1360	1040	1280	1200	1720	960	1160	600	520	1120	1240	880	1120	800	2200	2480	1840	2280
L04	28118	26804	34147	2224	1228	2211	2548	4415	2959	25064	33571	7544	257	337	72	662	1382	860	2479	2969	4259	5989	2830	2471	6372	5217	6234	1720	1880	2680	2200	2360	1880	1680	1040	600	480	440	680	720	1320	960	920	440	640	2320	2240	1800	3800
L05	8531	5927	8486	3476	3421	1501	4660	7440	6544	13034	9649	4189	975	1250	58	305	546	786	965	496	519	2021	1682	1739	9078	8286	21823	2480	800	2240	2640	2800	2240	2520	2080	2320	1440	800	680	1080	1120	840	240	480	880	1800	3040	2760	27200
L06	39345	38714	41343	4740	8927	4720	39253	35506	49831	13351	12915	4188	1472	703	654	868	100	242	4189	3738	1429	3239	3694	6152	5582	7537	11932	2200	1640	1760	3280	1720	3040	1720	1880	5200	720	880	760	1760	840	1360	960	520	1480	1440	1400	1240	1480
L07	3651	3593	5735	74789	86688	56730	20604	23781	25491	24774	23017	6207	175	425	159	8058	9666	12821	6933	8532	4844	4430	4709	4346	2150	2571	4071	1400	680	1440	1840	2360	2760	2880	2960	3800	1120	280	440	1080	440	480	880	520	800	3120	3800	3840	6880
L08	1417	826	1025	13919	12889	12232	10327	10569	6711	7535	13873	2724	699	467	427	351	101	443	962	1352	231	4214	5801	4651	8929	9864	13223	3320	880	2320	2960	3520	5600	1520	1320	1200	600	720	280	520	1040	1600	760	600	1320	2160	2120	2080	1760
L09	6049	6551	6261	15062	10078	6823	2201	3410	4891	7370	7369	1618	1250	502	619	74	232	192	6641	6250	4437	8681	10495	9509	5902	5742	12131	4800	8880	10720	1600	1080	2560	4080	3000	7200	480	600	1000	680	840	560	600	520	720	1720	920	1600	1840
L10	5594	6109	7035	1856	1412	526	1603	2283	1557	11391	9198	6345	783	631	469	111	181	100	9089	8867	11032	5464	9113	8604	3702	2894	3113	1760	1800	2080	2640	2720	2200	2280	2880	2760	840	360	440	680	920	440	1360	680	2120	1240	1280	2920	200
L11	22900	22416	32764	18330	2267	16840	9417	14998	16851	4340	5278	2769	766	529	285	633	2389	2112	4663	5055	4044	5593	7848	6970	5353	5633	10390	3080	680	1120	3280	4840	5520	2040	800	1080	480	600	640	960	440	840	840	1120	2240	1920	960	2560	1240
L12	3970	3904	3256	5318	2488	1700	5527	4571	6770	3681	2254	525	1538	3217	2513	507	222	257	3134	1901	2299	1268	983	802	726	372	1149	1600	1640	2280	3040	1320	1200	400	1680	1160	840	400	520	2080	1280	1080	840	680	840	1040	1160	1040	1800
L13	2698	4403	4622	2010	1516	1708	21386	31085	28317	13203	10684	4142	173	531	294	191	152	310	2034	2298	1500	3349	4218	4154	4476	3831	8661	2200	2000	1760	1840	2360	1800	3200	2680	1760	320	280	520	1080	840	520	680	960	800	2600	1280	1200	1960
L14	41680	34528	21373	14903	13508	11506	7606	6592	8983	12697	10702	2168	1823	1345	1923	790	353	310	7437	5022	4888	5595	4401	2063	3375	5333	6520	2880	5800	3960	1600	1520	1760	2560	1880	1280	1280	440	1040	1200	1040	240	1200	760	1320	1480	2040	1800	1400
L15	12914	8832	7609	7286	8589	5694	10464	10042	9445	6177	10001	1945	404	497	763	304	665	589	5624	2873	2150	7274	4985	6612	4715	4939	7987	2320	2160	1200	1160	1440	1320	1720	1040	1000	1440	200	920	1000	840	880	920	1040	1520	1960	2760	2680	1840
L16	14118	8214	12446	6239	2853	2456	3722	9122	6333	6207	8117	1321	2912	697	2024	871	547	512	6281	5274	3383	1625	973	596	3165	3570	4520	3560	1520	2320	2080	2000	1880	1120	2360	2200	1240	760	1280	1360	760	1520	1440	1080	480	3480	2920	2520	2720
L17	9838	8263	6492	8077	4670	4064	5989	11720	7844	20989	18785	5838	1447	1778	1099	825	830	310	6087	5937	4841	4381	1159	854	4865	4276	6817	1320	2520	2000	1240	1400	1200	2080	1360	2440	560	200	840	760	2120	1760	240	200	800	3240	1960	1720	1400
L18	8763	9631	8689	3243	3802	1313	4797	11173	12482	11402	14900	3479	861	168	173	910	144	103	1783	1010	810	5538	4357	4985	3299	3538	5090	2640	1520	2320	960	1600	960	2320	960	1240	1040	880	400	1880	840	1760	360	840	480	2480	2160	1880	1120
L19	9717	7701	7713	472	1230	949	8004	9030	8863	14001	30048	10876	1025	1135	792	629	1236	1554	1097	159	824	3467	3219	4372	3619	4071	7066	1920	1600	1120	1560	1280	880	3280	920	1680	520	1120	1160	1600	1280	1080	920	1960	800	1840	1640	2440	2000
L20	6683	3936	7768	8188	5270	3831	13052	18063	14021	17772	18891	11278	804	1492	320	267	143	60	2067	3293	1608	6106	6230	7734	4741	3675	5237	1440	1440	1720	2800	2520	2240	2000	1520	1640	600	1360	560	1160	1200	1360	800	1000	2200	3240	3280	2680	3280
L21	7496	5813	5541	971	2130	2099	12820	16010	25020	17346	15027	2730	425	734	897	788	1149	1111	3767	1764	2261	2468	2056	2963	4238	4158	6693	1520	1640	1920	3280	2040	1240	1880	1040	1560	840	400	320	1000	920	800	1200	880	880	1720	1600	1640	1920
L22	8063	8977	8833	9001	5974	7644	4946	7073	10815	12406	9441	3616	577	1119	1412	1142	1346	868	1985	2169	2660	4725	5395	3263	7454	2573	7501	2520	2920	1840	2920	1200	1320	2280	920	1760	1200	1040	1400	1200	480	600	520	960	880	1760	2000	2160	2600
L23	4934	7465	5572	7355	6269	4950	7746	12245	10556	13142	11417	1431	464	1819	624	1150	741	389	3630	3976	3955	5490	6273	4495	4872	4378	5764	2520	1800	1480	2400	2640	1280	2320	2080	2080	1040	400	1720	1200	1880	1200	1320	640	320	2200	2400	2400	1160
M02	8356	6203	9751	6482	11046	4651	8445	11336	12191	13765	11662	3291	376	697	383	464	1182	660	2936	5504	4510	4152	4728	8035	2668	4437	8154	1920	1240	1680	2280	2440	1480	1440	1920	1560	920	480	480	520	200	1080	1440	640	1280	2400	3760	2560	2080
M03	2336	1971	1951	11000	12893	7857	9137	8782	10913	19788	15739	4537	623	262	428	764	255	423	9362	12209	13591	1567	1664	1933	1873	2526	4220	1680	2160	2560	3800	2320	1840	2800	920	3040	720	800	440	360	400	3080	1480	400	200	1880	3360	2960	3120
M04	83525	73637	101442	10095	11336	5239	77370	99374	105497	62653	61182	21104	742	993	714	66	107	107	7665	8146	5020	6777	8167	6241	7899	5552	11036	1920	2720	2000	3280	1840	2040	2440	2400	4160	720	760	640	600	1320	600	1440	1320	760	4240	2320	2440	2840
M05	8570	7432	8238	7373	10893	7919	12050	13685	12863	17973	14973	1738	681	343	252	913	474	748	20209	24729	21570	2973	2752	1892	4835	2163	4993	2480	2560	1320	1360	1760	1520	1520	1400	2200	1040	240	1160	1080	640	1480	760	920	600	2320	2600	2160	5040
M06	4031	5079	2105	15018	14458	11487	7340	11809	10625	11862	11812	4052	4182	7433	3404	658	230	262	10519	12711	9002	5793	3885	7208	4077	4753	2134	3160	2640	2200	1880	1400	2280	2200	1680	3280	920	1240	520	1080	960	1160	1080	280	560	4240	2800	4800	1520
M07	2416	2487	2507	4202	5416	3508	21697	18492	16792	2833	2493	768	22668	28854	12515	1784	856	1637	12082	13113	10819	3033	5032	3829	5317	5965	8196	2000	3640	1440	2960	2320	1920	3200	2360	5720	1480	840	1200	1480	920	560	840	480	880	1360	2280	1160	2480
M08	15270	15652	13343	3840	1925	3514	2650	3822	2503	12343	12992	3957	1736	828	1115	535	470	542	6164	10297	6555	3659	4386	3154	6462	10672	19749	3000	1160	2840	2800	1400	3360	1920	920	1800	800	760	560	1400	1320	840	840	440	760	2120	3120	2240	5480
M09	10234	7638	6539	6870	6710	11751	12770	15555	18135	22520	18540	4417	2009	1454	2079	349	429	106	15878	27299	20901	5838	5565	6785	18652	24919	37693	1760	1800	2840	2320	2600	1720	1240	1320	1400	880	640	1120	480	800	1800	360	520	360	3760	3400	4120	1680
M10	8787	6769	5197	7480	7203	7989	9302	15264	10146	7621	3259	2013	323	96	407	751	750	1152	11890	8304	5051	8379	23803	24397	3815	3873	7317	2280	1600	2320	2920	3160	2280	3000	3200	4400	920	760	720	320	400	520	920	560	1200	3000	3520	4400	1640
M11	3418	4165	3933	2778	2559	1561	11227	11737	11729	10089	9168	3735	2531	1454	2895	547	977	699	18093	20433	21440	2364	2811	2759	5164	5331	3714	1480	1560	2320	2080	1720	2080	1920	3120	4640	640	560	600	480	760	1000	1200	1000	1200	4960	4360	3920	520
M12	14530	12185	9667	8441	7879	3137	8658	13222	12929	10559	9967	2399	1364	2686	523	507	305	339	11796	10629	7751	16225	12948	14204	6520	19652	27793	2200	1880	2360	1520	1560	1280	920	960	2200	800	240	760	600	400	520	240	400	760	2280	3320	2320	11440
M13	7818	5612	8429	9869	7152	5339	26904	22738	11811	15701	22715	4379	1059	205	114	189	832	909	15317	7495	7240	7892	4499	2822	4555	4804	7783	2360	1560	800	2080	1440	1400	3200	1400	3360	960	120	680	1040	480	760	280	240	800	4440	4240	3520	12560
M14	1677	2792	2529	4624	4949	3098	12638	13446	15668	10337	13226	2468	7891	7579	5417	465	261	806	7566	6180	4642	4256	5531	4178	5215	5429	7922	1640	1720	2200	2840	3400	2240	2920	1720	2760	480	280	600	1680	760	1240	1680	1040	1400	3120	1400	1120	280
M15	27835	19480	25051	4965	6087	4069	6060	4778	8940	8800	9590	1722	961	1489	1530	269	862	506	4759	2638	2588	5249	5524	8279	4153	5766	6701	2400	1200	920	2000	2440	2240	2160	760	1440	760	360	640	880	640	320	1000	360	400	2640	2000	3040	4200
M16	8921	10035	7999	9344	9991	6567	6620	6223	10277	10111	15881	4743	1964	2208	612	109	307	147	9559	16613	14045	10215	10754	13267	5781	5022	6787	2760	2280	2720	4240	2600	2040	3640	1840	5800	840	240	760	1640	2080	1480	920	920	1680	2760	3200	3160	400
M17	15425	17553	14239	9791	10717	9309	11154	11115	18980	44335	82483	20059	1608	2237	930	866	870	989	5800	6307	4970	4808	2808	2218	5164	4450	7312	2240	1600	1480	3080	2200	2040	4960	2800	5640	2440	720	680	1000	2720	1360	880	840	1160	3280	3200	1960	440
M18	29727	21833	24280	13577	9373	7439	14400	12709	16333	33323	16887	3987	656	2418	2906	225	512	749	8629	4930	5842	8758	9212	8248	6131	5621	6173	4040	1360	1520	2120	2040	1880	2880	2000	2960	960	720	600	1800	2280	1720	1440	920	840	4200	2040	1400	2200
M19	4989	2770	5289	8122	1786	3937	6061	3213	6095	20956	24584	5470	180	688	137	507	179	584	7932	8274	4825	3240	3799	4641	6278	5704	6671	3000	2320	1360	2040	2520	1840	3360	9320	14360	400	240	2040	1400	760	640	840	440	1400	2640	1440	3480	960
M20	21118	21290	11777	11070	9049	10819	83524	90174	104291	14250	12663	4365	528	452	382	188	69	228	7224	7453	7527	15018	14836	15334	6123	3448	9523	2880	2560	2160	2240	1840	1080	4000	1560	3640	840	1160	1120	1160	1720	1680	960	680	1080	2680	2240	1320	1160
M21	11247	12795	13880	4512	3501	2081	13280	15000	16290	5007	2043	1032	936	575	1134	507	308	388	3496	3029	3196	21073	22906	18742	4852	4245	8147	1480	1840	1480	1560	1400	1600	1920	1360	1920	760	920	1120	800	920	1200	680	600	1280	1440	1600	1760	5200
M22	1995	4574	1721	8479	3481	5306	17576	22258	23020	11465	20985	3466	2204	2956	2364	1097	541	226	3939	2484	1362	7104	2079	2320	4842	6954	6585	2440	2960	2080	2640	2240	1920	2320	4000	2200	800	840	1520	1400	1280	1720	1040	800	1080	3400	2720	2360	7240
M23	8169	8584	9199	6456	6080	3932	5120	6902	11583	10828	12108	2304	813	1279	1208	417	1261	700	3336	5993	5314	4176	4753	4405	4726	4106	7599	2200	1800	840	1760	2960	1680	2160	880	1280	1680	240	360	1280	1040	1000	1040	920	1200	1920	2080	2480	1800
N02	7079	7699	7735	7295	11972	5160	14105	12277	13032	15588	13235	3334	1185	1706	1147	603	1214	462	3471	6042	2808	8268	5981	5872	3783	4697	8200	1480	3000	1960	2840	4320	2520	2720	1600	3560	680	800	640	1680	920	1040	1480	1080	1000	2600	3080	1920	2040
N03	18394	25427	19191	18309	13854	11364	13193	14616	18379	76873	54285	5788	1017	1023	947	5507	2508	1549	8276	4323	3723	6899	8615	9085	557	788	1022	2040	1320	2760	2720	2040	1520	2800	3080	2680	1120	400	680	1120	400	1160	840	560	1480	3240	3960	2720	4120
N04	8285	5503	10428	4882	7554	3541	58982	47213	82825	11366	8869	2820	1659	263	265	47	183	264	6376	5644	7303	22227	19986	22090	4802	5522	6271	2520	1640	2600	2840	2000	3120	2440	2240	2160	920	480	520	1640	1120	1040	480	1240	1080	2480	1960	2840	2880
N05	2289	2599	2915	4498	3670	3018	954	1698	1151	24519	15108	3201	1023	431	792	190	68	1029	7261	5039	4381	4142	1675	3721	1142	2111	1731	2960	1440	1880	2680	2640	2040	2600	2880	2840	520	840	880	1320	320	2000	1120	840	1440	2960	2560	3480	680
N06	1043	1313	412	14962	13310	10415	9255	8850	8594	18046	16665	5094	31	16	156	343	269	500	6481	10114	8873	5972	8877	7901	6090	6927	7957	1560	2920	1840	3240	1720	2080	2040	1880	3040	280	960	1640	2280	1320	1400	1040	640	1920	1080	2120	1560	2880
N07	2256	2624	2158	14040	9237	9529	7956	7614	11788	16320	13712	5655	2825	2633	3122	813	1190	1299	4189	4994	4376	8643	9626	8429	1742	2175	2742	2800	1840	2200	1920	640	1640	3880	2760	3800	480	800	1200	1400	1440	1200	560	880	840	2200	1760	2400	3480
N08	8750	7741	6775	2150	1144	1029	32442	22993	25604	19658	23192	6791	351	160	226	1939	225	903	5704	4708	4286	4730	7174	6846	6195	3728	7277	1960	1120	1120	1880	1840	1480	1600	2080	1800	480	400	760	5120	3360	5400	1440	880	760	1920	2920	2040	5120
N09	13738	14253	14690	40125	47258	40654	4586	6181	7467	7122	7401	3490	16573	10345	12335	661	433	551	39910	43108	44460	8041	10522	15773	2523	789	653	1640	1000	3000	1560	1880	1760	3040	3760	4760	760	1000	760	2120	520	2840	1320	640	800	4560	3920	3640	6160
N10	11093	8619	3873	1578	2221	1489	5764	8511	6173	23711	16700	4561	1125	644	308	579	185	427	4675	3212	1679	3877	2520	2894	5498	3852	5900	2280	2480	1800	2160	2920	1280	1600	960	1920	1080	240	960	1320	1400	1000	480	360	960	2080	1400	1360	2720
N11	630	614	250	12810	4374	7839	10306	10610	22732	17924	22366	4256	2689	1296	3252	483	666	213	4546	5362	3936	12226	10899	12146	4766	4688	5718	1440	1160	680	3840	2880	3720	1440	1840	3240	280	880	920	1080	240	840	360	1400	1000	2200	1400	2240	3080
N12	11141	9980	7566	1456	915	1480	10068	6399	9970	27297	20978	5453	1157	1077	1084	1029	548	1910	6861	7643	6222	4952	7519	6509	3510	975	1899	2280	720	1520	1040	1560	1160	14120	6880	14000	400	1000	440	1720	560	800	1080	560	680	4560	2880	3160	8320
N13	5686	6403	6023	44190	30115	31643	9811	10455	12674	55287	60049	23574	1413	2626	1909	744	661	477	14522	20841	14317	2222	2383	2120	6116	6176	8866	3280	2200	3880	1760	3280	2320	3480	3120	6680	560	720	480	440	600	640	1400	440	680	2240	2520	2520	5280
N14	9564	6334	8028	7884	2927	3767	9409	6982	7331	1735	1307	651	1179	402	436	1381	1338	4463	6914	9480	6179	6815	4792	4741	6453	7349	6702	2280	1800	2160	3760	4720	2960	2840	2680	2160	440	680	520	800	2120	1400	2960	1600	2080	2040	1240	2640	7560
N15	4804	6079	7555	35063	32582	29703	2191	2626	3538	8631	12247	4647	3927	2459	5743	1029	1904	928	5782	3067	2546	5011	6570	4607	6831	4779	9173	2240	2120	1880	3000	2240	2880	1880	1000	1080	2280	400	760	1640	960	960	1120	960	1120	2280	2240	1840	1440
N16	6815	5522	5690	2404	2543	3850	3786	6342	8982	6385	7046	1436	713	1202	438	17	59	221	11709	11639	9214	6813	5631	5242	4990	3475	4774	2640	2880	2080	2920	2960	2960	2720	2000	1920	840	960	520	1320	1560	1360	320	1000	840	2040	2400	3280	1240
N17	3556	3386	3629	20289	18965	4946	2430	5717	4321	10747	10343	2945	1676	1250	783	1312	151	791	4099	3349	2063	3722	6071	3098	3841	4664	10118	2000	2800	1240	2200	3440	4040	2920	3800	3680	760	600	1080	1560	640	1960	720	1120	1120	2600	2720	3360	960
N18	18865	13781	14125	47303	45519	21202	5696	4087	9137	22301	19847	8968	1568	724	1136	302	263	307	7711	3804	3088	742	851	717	4480	3819	6856	2920	2560	2080	1840	2960	1200	4120	2080	3000	1040	280	680	520	2000	1800	480	2440	840	2240	2240	2760	1520
N19	5776	4651	4635	9587	25390	13420	12657	15353	18963	24470	28320	10911	1280	1769	97	1309	1868	304	2119	2658	2650	1336	1379	335	5724	3880	7195	1840	1720	1400	1800	1960	2040	3200	1560	3760	920	640	1120	760	200	560	1800	520	720	2160	1960	2520	2000
N20	5228	6663	5315	2093	1702	681	532	1823	1656	10823	6662	2507	3818	2222	1508	863	1261	1109	3463	4479	3263	1846	3286	1991	4876	6304	7627	1880	1560	920	1960	1800	1960	2200	2440	3000	680	560	840	1920	760	800	840	720	320	2120	2600	3160	1600
N21	10923	12096	9261	1959	2723	2839	8425	8201	11362	12518	14620	5021	1092	297	913	300	387	547	3654	4324	3741	12190	11635	10996	3921	5845	7786	3520	1640	2720	3440	3200	1880	1520	2160	2560	640	240	680	1440	1080	520	520	480	1360	2960	2240	2720	760
N22	1798	2510	3430	15777	20114	10163	8663	9631	13744	9547	6830	2574	3992	4915	2553	1925	467	388	1904	2152	2672	1224	2880	2065	3987	4143	7775	2560	1160	1200	2680	1680	2280	2960	880	1720	1120	560	1040	1520	880	2000	1560	1080	960	2600	2920	2000	2280
N23	7389	7014	9270	6141	8326	5562	6993	8646	8879	8665	8939	1974	485	596	689	0	319	1060	3476	6061	6877	3461	4253	3751	2826	2919	6129	2840	2560	3880	3640	3600	3480	2720	2040	3640	2440	2480	2000	2160	2600	2880	2320	2160	2400	4280	4560	5120	3920
O02	9215	7860	11124	8197	8411	5400	8971	9871	13100	11903	13713	2568	1105	622	990	666	828	951	4540	3786	4297	5118	4188	5552	6735	5719	4838	2000	1200	1960	2040	1760	2720	840	1360	1480	640	1240	560	240	560	880	920	560	880	3160	2400	3440	2120
O03	10616	7234	15807	6868	7525	3785	11459	13566	10384	16681	16671	5493	569	783	506	883	379	823	9983	11248	11482	7451	5387	4828	4185	3678	5861	1840	760	1320	2120	2840	2760	1520	1120	2240	760	960	720	400	160	480	440	1080	1400	4360	3400	2840	3760
O04	9998	9403	8012	9539	7491	4997	18123	17633	19759	7329	7705	2224	975	575	266	228	384	142	9452	17217	18060	5448	5102	7292	4027	5202	8959	3040	800	3000	3760	2880	1920	1240	1480	3800	760	680	600	1280	720	400	400	520	1200	1680	3040	2360	3480
O05	7947	13580	9036	12132	12795	10463	27812	26461	32886	8150	10175	4026	526	859	582	389	1232	507	6024	2549	1396	7757	5095	3590	8859	8309	14455	2320	1360	1360	3600	2640	1920	2520	1760	4400	360	840	1680	1560	680	1320	1520	1040	840	3320	3840	3200	6560
O06	4654	4779	4543	8772	9799	8785	8066	11394	11507	10137	11503	5909	340	479	317	1309	387	947	6098	6488	4387	7423	6444	5048	5230	3620	352	3160	2040	3320	2000	2920	1920	2280	2080	2720	800	920	640	920	1480	1240	760	440	1200	2880	1840	2960	2720
O07	6107	5219	4561	6201	8352	4090	9003	11248	15275	15856	22787	5902	1115	888	969	736	345	662	6074	8591	8615	21407	17121	18924	7085	9319	15578	3760	1160	1880	3160	3440	3360	1840	1880	2040	1440	840	520	960	1000	1280	680	720	880	2720	3400	3240	5760
O08	6146	6657	10148	8459	9055	5677	19158	25563	33944	31947	45559	9810	1905	311	263	1696	634	629	2706	866	776	6075	8244	6942	4015	5934	5365	3760	2040	2120	3320	2720	1360	2560	2200	1800	1840	680	1480	1080	720	640	640	960	1400	1760	2120	2240	1480
O09	1980	1797	1801	8412	6785	3492	16026	20648	23773	12334	12551	3730	919	238	1479	577	308	151	10420	9027	4429	13664	19708	16290	4952	5378	4086	2400	1960	2440	1960	2880	2280	4760	2600	6000	680	960	1040	160	320	400	1000	520	1360	3000	3520	3720	1880
O10	2702	3116	2266	30155	24023	21178	10380	11927	14179	10779	5435	4155	1140	1984	544	1720	908	342	8890	5361	3949	7594	4826	2436	6730	2314	3600	1800	2480	2000	2200	1320	1240	2720	1480	1440	360	1240	1000	800	1240	1840	1560	1880	640	2760	2160	3120	1680
O11	11747	10291	11196	4482	4435	1392	3514	6746	4677	16496	15855	4608	561	1010	647	4500	739	1740	8298	3611	3320	4970	4637	4009	6034	2347	2568	2160	4080	6080	1960	3440	2440	1520	2280	3640	240	960	840	600	1680	720	1280	1080	720	1880	1800	2760	4160
O12	3643	5541	4056	83338	81318	44119	8592	8454	14054	5828	11604	3235	2206	1088	676	245	547	694	7751	5083	5313	6025	2559	2090	5612	2571	4442	3200	1120	920	2240	2240	2560	3400	1080	2080	1280	560	320	840	760	600	920	1560	2120	4080	1640	1880	2160
O13	5866	5725	7286	1573	2088	1605	8711	10805	14223	2837	1929	747	1148	607	252	255	701	417	20281	24461	30521	47918	7242	6744	7446	5169	6970	1840	1680	1760	3200	1080	1880	1040	3440	4200	520	840	480	800	640	880	1080	800	440	3160	2400	2920	640
O14	15012	17550	28566	30724	24854	20773	9058	4851	8623	9053	10257	3363	4920	1459	2065	1226	1105	769	8558	12580	10421	6466	8239	6601	7921	6891	5747	2480	2440	2240	2160	1880	2480	1720	1080	2000	360	1600	1160	880	360	1320	800	560	1120	1520	2320	2680	1400
O15	5181	4367	4789	7703	4473	4472	3384	5455	6735	12545	8424	1786	2906	452	471	212	491	536	8007	6709	5487	7451	3321	1624	7202	8494	7793	2600	1640	2560	2800	4320	3000	2960	2520	3240	960	2280	360	1000	560	760	1080	640	600	2960	3160	3720	3000
O16	7550	7904	6584	13559	13323	7159	12514	17033	20450	15302	9450	2462	705	822	426	1668	1473	1434	10761	19994	14423	7175	13971	7240	6580	7662	6938	3360	2400	1400	1840	3680	1520	2280	2120	3720	760	880	1360	1640	1280	1640	760	760	1160	2000	2600	2880	2640
O17	45616	30081	39524	2738	4273	3704	9402	14252	12364	21736	22443	7985	4000	1128	418	94	347	64	6975	8645	6928	7148	4791	8541	6357	5193	9613	2480	1640	2520	2800	3040	2120	3520	2200	2400	1320	560	2600	720	1360	1480	760	1280	1240	1200	920	1760	3960
O18	20112	15821	15905	8830	10141	9208	10349	14946	14309	41478	42120	16289	2038	898	423	394	512	431	7971	2228	2077	3624	2775	3061	5549	3643	9104	1880	3200	1400	2120	4800	2360	3240	2200	2000	920	1240	920	1040	1440	1440	2160	1320	1360	1720	2520	1560	8080
O19	10374	10003	11449	9261	9654	6112	11925	11893	16518	25366	33734	5782	1563	1886	1256	303	340	830	2288	1622	1251	5179	9703	3861	4862	5472	7962	2160	1400	2360	7040	5640	3840	1880	1760	1920	560	480	1000	880	2360	1160	800	680	960	5880	5440	2800	5200
O20	7160	7814	3633	3062	1535	1172	8405	11790	13606	22880	18631	3421	870	634	642	1187	1026	821	4027	6982	3117	5958	6642	3322	6145	3714	6058	3440	1720	2040	1680	2280	2400	4080	2120	2800	1000	680	1080	480	1480	1080	760	720	760	2920	1920	2640	1680
O21	1902	2973	1795	13419	9751	8531	7391	7645	9158	9711	8277	4088	3445	3618	3215	208	113	317	9887	10906	15574	5914	7402	6323	7405	5607	7274	1640	1520	1400	1600	2280	1280	1480	2120	1680	680	560	1240	1680	1680	1680	1040	520	760	3000	2720	3200	3600
O22	5305	10996	7332	1475	1362	28	6115	6452	9820	10805	7166	2478	1549	460	515	8747	11880	11096	5407	3912	4734	3882	5190	1541	3773	3889	6569	2640	3080	3040	3600	3920	3080	3840	3480	4560	2240	2360	2440	2320	2440	2840	2680	2400	3120	3520	4400	4200	4160
O23	961817	912592	893641	632391	544277	615195	616741	553686	618416	806974	679218	542664	290986	334629	349263	310787	324130	335331	60286	545136	542523	424892	474736	487173	94849	440530	532680	278680	377040	445160	392200	465040	402040	176000	360400	487920	308920	347120	370400	393520	295600	374760	402560	332560	358880	463160	486720	473760	237240
P02	7934	9827	11239	7583	6805	5116	7798	10989	7882	12828	13696	3898	860	631	152	954	474	232	4282	6648	4044	5881	4984	4760	3531	6072	7678	1000	800	2040	1960	2120	1120	1960	1880	3600	400	440	920	880	480	1000	640	560	480	1800	3360	2600	2880
P03	2369	1258	2982	9033	12048	9447	19924	35104	43999	3974	4501	1202	2382	858	350	306	109	465	1978	1667	1927	8782	5694	8608	5444	2766	2433	2360	960	1560	1600	3480	3600	1880	2040	1920	1320	440	400	1160	1560	1400	760	1160	1120	1800	3560	2800	2720
P04	8333	8135	11822	7997	12765	3957	8156	6185	9639	17681	15619	4630	1722	2540	1187	716	1034	1595	3888	5805	4595	4054	1310	2993	5785	3527	9295	1680	800	1920	2760	3480	3160	1440	2800	5800	560	440	1160	2040	600	1480	1160	760	680	1440	2480	2560	3120
P05	28287	22250	27905	10446	7929	7444	26642	35871	21946	60149	55997	5345	3218	1871	1597	232	505	225	1227	1600	2339	4553	5221	6780	7391	4971	7070	4200	2160	1360	1600	2600	2280	2200	1880	3120	840	800	1200	1880	600	1040	360	760	1000	2040	2640	2560	3280
P06	10677	12147	10195	7309	8570	6173	35168	40235	38728	3673	2329	1079	45163	34453	20459	389	512	632	6746	5776	4712	3585	3993	3894	8477	7737	13945	2040	1680	2680	2520	3240	3040	2680	1240	4680	1560	560	1360	1680	560	480	800	680	2080	2880	3240	2640	4080
P07	3348	3764	4261	3961	1656	2672	6152	10423	7205	17344	17146	3223	2423	1843	1520	468	514	311	2121	3193	1721	4638	3612	6970	2070	2422	1952	1720	1720	3280	2280	3520	2440	2560	1240	2200	560	960	840	1520	1240	760	1120	680	1840	2800	2320	4040	2120
P08	6614	3154	2712	14778	8769	12619	7276	8732	9374	11020	12250	3116	82	175	181	1027	232	234	1320	1198	808	11206	12454	11273	553	543	779	2160	2520	2760	2680	2520	2400	5200	3960	3280	640	1920	1560	1000	1600	800	1680	560	1360	1560	3000	2200	3880
P09	23671	26563	23014	12713	8937	9649	3472	4364	5870	11502	14348	2029	2269	2192	1469	63	232	73	2197	3155	3135	9343	13878	8413	2191	1786	3283	2480	2240	1400	1960	2160	1440	2160	3360	4080	560	480	680	1400	1160	1000	1040	440	960	1480	3440	2560	1920
P10	21321	22740	14094	6023	2299	3265	13760	12668	18569	7928	5247	2199	776	811	261	1504	945	865	2916	4773	6156	6821	11235	5881	3081	3658	1608	2120	2440	2280	3360	3520	3240	1120	2400	2800	880	880	1040	1000	1360	1400	760	2760	840	2840	1160	1960	3360
P11	1740	2383	662	10609	6769	7882	14462	14160	20927	26154	28906	8179	935	1053	1442	964	1629	2343	3808	10519	7846	7842	3381	3015	5136	6786	5924	2320	1240	2520	1920	4160	3080	3400	3520	2360	360	800	1440	1240	1240	400	480	1080	720	2520	1960	3000	1440
P12	6372	5924	6595	689	4674	1172	14457	16173	25306	41088	45798	11251	3138	3064	5826	421	302	492	8750	12629	10496	1487	1403	1257	16576	18044	23739	2840	2080	1360	2200	3480	3280	2880	3720	2560	760	680	840	1320	840	640	1160	400	520	3000	1040	3960	13320
P13	13700	12498	17522	5689	6911	3735	9530	10631	10042	1548	2141	795	766	688	238	2233	1034	2074	18714	94319	84627	63856	58356	85788	7506	3880	7377	3320	1920	1320	1720	4160	3200	2800	1360	1840	920	560	600	1920	1000	800	760	360	600	1040	1880	1720	1440
P14	5376	6257	6773	1662	529	776	10653	17505	24532	15429	12852	3061	1688	2146	1424	535	104	137	7595	4436	3033	4285	5432	6976	7116	5502	9321	2000	3600	3840	1520	2800	1480	2240	3240	3800	440	640	640	560	1000	560	840	640	1680	5440	6720	5520	1920
P15	4171	2787	1877	2901	2640	1398	14769	15531	21714	12375	13665	6378	82	343	543	1026	715	1195	16423	16360	14253	14834	14165	20323	6644	6560	7807	3200	2080	2680	2520	3160	2880	3800	2960	4560	1320	1040	760	840	1560	840	960	760	520	2200	2440	2840	5600
P16	8729	5735	10225	7766	8662	8976	5513	3442	5229	12201	9783	6217	2180	338	1062	1737	267	145	8632	2187	2553	1708	2562	3023	6333	7363	10117	1440	1840	1840	3440	4280	2880	3480	3280	3040	560	600	1080	1560	360	1640	1000	640	1480	4440	3800	4360	2640
P17	388	443	632	11062	8641	9991	2698	2817	2784	7640	8127	2218	2724	2751	2311	1348	194	157	2659	1806	1207	240641	246492	250383	5727	6534	7051	1520	1560	2760	1840	3480	1800	2360	3360	2160	600	600	960	1160	1480	800	1520	640	2040	2520	3040	4880	1960
P18	5363	6710	9251	6672	8077	3018	3228	7628	6444	15869	16392	4010	280	45	128	309	475	355	16788	16666	10677	1251	467	1619	7497	6238	6757	2080	1560	920	3080	7160	2560	1560	2480	2160	680	240	400	2920	1040	2400	1200	800	720	3880	3760	3480	1280
P19	7012	6593	9543	9951	10114	6127	3235	5645	10595	9749	7785	1076	2349	2706	3067	192	191	227	5569	5256	4203	6948	13613	10832	7052	4306	5664	960	1440	2040	1600	3120	2920	2040	1080	2000	800	1400	640	640	880	1480	1160	1440	1640	1720	2480	2440	3040
P20	3223	5812	3542	6965	4537	3774	7193	8073	13477	24770	38294	5140	136	458	817	866	749	1150	7948	7460	9095	8658	7516	8789	6892	5131	9579	1640	2960	2480	2760	2680	1600	3400	1480	2360	880	1080	880	840	1600	1040	680	680	320	3320	2920	3440	4680
P21	24850	26499	26028	7137	6375	4301	3731	5161	4799	22499	20425	6062	1018	573	373	1070	669	665	6627	5455	4056	5149	1827	2035	5921	4117	6062	2320	1680	1160	3640	3680	3360	3720	1520	1320	1120	920	1080	1120	680	1680	640	1240	1480	1840	2320	2600	1400
P22	6699	8661	10482	41299	40678	34316	4794	5417	5914	4465	5913	1072	360	808	685	559	908	1073	5991	7608	8328	8824	8774	14450	6956	4027	7789	1840	2000	1320	2240	2560	2240	4280	1920	2880	1120	760	1280	1120	1120	920	1080	1000	480	2440	2480	4080	3320
P23	6287	6267	6842	8956	7447	3411	5924	7949	8309	10754	9253	1315	1430	986	1586	1359	443	220	3072	4665	5075	3323	6567	3428	4156	3783	4933	2320	3680	2480	3920	4160	3360	2080	2320	3280	1520	2240	2120	2240	2080	1920	3080	2560	1920	4440	4480	6000	2400
Median	6613	5925.5	6200.5	8039.5	7241	5483.5	8008	9649	9850.5	12394	11613.5	3356.5	1061	809.5	620.5	497.5	471.5	491	5104.5	4462	3942.5	5433.5	4429.5	4657	4803	4206.5	6724	2160	1580	1840	2200	1960	1840	1940	1600	2140	800	660	760	1080	920	1000	800	760	960	2560	2320	2380	2320
[truncated: 125 more columns]

## Sheet: Gene list
Plate	Well	Gene
101	A03	VIPR1
101	A04	CHRM1
101	A05	CNR1
101	A06	AVPR1B
101	A07	XCR1
101	A08	DRD5
101	A09	TAAR6
101	A10	LEPR
101	A11	CCR8
101	A12	GPR155
101	A13	GPR68
101	A14	GPR45
101	A15	CX3CR1
101	A16	MLNR
101	A17	GPR18
101	A18	NMBR
101	A19	CCR9
101	A20	GPR151
101	A21	GPR15
101	A22	GPR144
101	B03	HTR1E
101	B04	GPR111
101	B05	VN1R5
101	B06	RGR
101	B07	GPR41
101	B08	CELSR3
101	B09	P2RY12
101	B10	DRD3
101	B11	FZD4
101	B12	CCRL2
101	B13	CCR3
101	B14	VN1R2
101	B15	GPR126
101	B16	C17ORF35
101	B17	HRH1
101	B18	P2RY6
101	B19	GPR82
101	B20	GPR44
101	B21	CXCR3
101	B22	GRM6
101	C03	GPR120
101	C04	FZD7
101	C05	GPR157
101	C06	CRY1
101	C07	HTR5A
101	C08	GPR19
101	C09	P2RY13
101	C10	FKSG83
101	C11	GHSR
101	C12	HTR1D
101	C13	FZD8
101	C14	BAI3
101	C15	GPR173
101	C16	GPR88
101	C17	MTNR1B
101	C18	OPN5
101	C19	GPR109A
101	C20	GPR3
101	C21	GPR103
101	C22	GPR158L1
101	D03	GPR34
101	D04	TACR3
101	D05	EDG4
101	D06	GPR63
101	D07	LPHN2
101	D08	VIPR2
101	D09	GALR1
101	D10	GRM5
101	D11	PTHR1
101	D12	GPR26
101	D13	ADORA1
101	D14	GPRC5C
101	D15	GRM1
101	D16	PPYR1
101	D17	GPR65
101	D18	HRH3
101	D19	GPR92
101	D20	GPR23
101	D21	GPR4
101	D22	GPR17
101	E03	GPR8
101	E04	SSTR1
101	E05	LPHN3
101	E06	OPN1LW
101	E07	PTGER3
101	E08	P2RY4
101	E09	LGR7
101	E10	CCKAR
101	E11	GPR51
101	E12	BAI2
101	E13	MRGPRF
101	E14	GPR132
101	E15	MASS1
101	E16	NPR3
101	E17	GPR6
101	E18	F2R
101	E19	NPY5R
101	E20	HTR3B
101	E21	P2RY8
101	E22	SORCS3
101	F03	CXCR4
101	F04	GPR30
101	F05	GRM4
101	F06	CXADR
101	F07	LPHN1
101	F08	GPR162
101	F09	FPRL2
101	F10	CRHR1
101	F11	GALR2
101	F12	CASR
101	F13	ADORA2A
101	F14	SSTR2
101	F15	IL8RA
101	F16	HTR1B
101	F17	OPRS1
101	F18	GPR125
101	F19	GPR145
101	F20	GPR149
101	F21	GPR153
101	F22	ADRA1A
101	G03	ADORA3
101	G04	TACR1
101	G05	GPR114
101	G06	MC2R
101	G07	GPR160
101	G08	GPR81
101	G09	GPR12
101	G10	NMUR1
101	G11	SORCS1
101	G12	ADORA2B
101	G13	CELSR2
101	G14	CD97
101	G15	GPR139
101	G16	DRD4
101	G17	LANCL1
101	G18	FZD5
101	G19	CELSR1
101	G20	GPR87
101	G21	MRGPRX3
101	G22	EDG8
101	H03	GPR97
101	H04	GPR7
101	H05	PTGER4
101	H06	SORCS2
101	H07	CHRM2
101	H08	OPRD1
101	H09	HTR1F
101	H10	NPR1
101	H11	GPR112
101	H12	OPRL1
101	H13	IL8RB
101	H14	GPR85
101	H15	MAS1
101	H16	MC1R
101	H17	CCBP2
101	H18	C5R1
101	H19	GRM2
101	H20	GHRHR
101	H21	CMKOR1
101	H22	CHRM5
101	I03	HRH2
101	I04	TRHR
101	I05	MAS1L
101	I06	GPR148
101	I07	GPR73L1
101	I08	HRH4
101	I09	DRD2
101	I10	HTR2C
101	I11	GPR73
101	I12	GPR154
101	I13	GPR174
101	I14	EDG6
101	I15	SSTR3
101	I16	GPR21
101	I17	PTGER1
101	I18	GPRC5D
101	I19	C3AR1
101	I20	SCTR
101	I21	GPRC5B
101	I22	GPR115
101	J03	EMR2
101	J04	AVPR2
101	J05	GCGR
101	J06	CCR6
101	J07	CRHR2
101	J08	LGR6
101	J09	GPR101
101	J10	GPR1
101	J11	FZD10
101	J12	DRD1
101	J13	GLP1R
101	J14	TAAR5
101	J15	GRM8
101	J16	RXFP4
101	J17	GRM7
101	J18	F2RL2
101	J19	GPR64
101	J20	GPR108
101	J21	GPR2
101	J22	GPR37
101	K03	CCR2
101	K04	HCRTR2
101	K05	P2RY1
101	K06	GRK1
101	K07	GPR48
101	K08	HTR7
101	K09	NPY1R
101	K10	RHO
101	K11	CCR1
101	K12	HCRTR1
101	K13	GNAT2
101	K14	CHRM3
101	K15	OXTR
101	K16	MC3R
101	K17	GPR119
101	K18	CCKBR
101	K19	GPR84
101	K20	GPR54
101	K21	MTNR1A
101	K22	P2RY11
101	L03	GPR171
101	L04	GPR39
101	L05	RAI3
101	L06	GPR124
101	L07	GPR161
101	L08	SSTR4
101	L09	SUCNR1
101	L10	HTR2B
101	L11	P2RY10
101	L12	GRPR
101	L13	BDKRB1
101	L14	FZD2
101	L15	ADCYAP1R1
101	L16	EDNRA
101	L17	MRGPRD
101	L18	GPR22
101	L19	ADRB1
101	L20	BLR1
101	L21	OPN4
101	L22	PTAFR
101	M03	TBXA2R
101	M04	NMUR2
101	M05	MRGPRX1
101	M06	CYSLTR2
101	M07	GPR158
101	M08	PTGER2
101	M09	GPR175
101	M10	OXGR1
101	M11	AGTR1
101	M12	VN1R1
101	M13	TACR2
101	M14	GPR56
101	M15	PTGFR
101	M16	LGR5
101	M17	FPR1
101	M18	AGTR2
101	M19	EDG1
101	M20	GPR
101	M21	GPR75
101	M22	GPR37L1
101	N03	CCR5
101	N04	GPR52
101	N05	CALCRL
101	N06	GPR147
101	N07	F2RL1
101	N08	GPR128
101	N09	EBI2
101	N10	TAAR1
101	N11	GPR152
101	N12	OXER1
101	N13	LTB4R
101	N14	ADRB3
101	N15	GPR116
101	N16	CCR7
101	N17	GPR35
101	N18	ADRA1B
101	N19	GPR31
101	N20	ADRA2C
101	N21	LHCGR
101	N22	GIPR
101	O03	HTR6
101	O04	TSHR
101	O05	AGTRL1
101	O06	MRGPRG
101	O07	GPR83
101	O08	MC4R
101	O09	LTB4R2
101	O10	RRH
101	O11	GPR141
101	O12	GPR43
101	O13	GPR123
101	O14	ADRA2B
101	O15	CHRM4
101	O16	TAAR8
101	O17	EDG3
101	O18	OMG
101	O19	GPR62
101	O20	GABBR1
101	O21	GPR113
101	O22	MRGPRX2
101	P03	P2RY2
101	P04	FZD6
101	P05	NPR2
101	P06	LGR8
101	P07	EMR1
101	P08	GPR135
101	P09	GPR50
101	P10	FPRL1
101	P11	FZD9
101	P12	FZD1
101	P13	EMR4
101	P14	GPR133
101	P15	HTR2A
101	P16	GPR61
101	P17	NTSR2
101	P18	PTGDR
101	P19	GPR32
101	P20	GPR146
101	P21	GPR110
101	P22	HTR4
102	A03	ADRA1D
102	A04	CNR2
102	A05	ADRB2
102	A06	MRGPRX4
102	A07	TAAR2
102	A08	OPN3
102	A09	GPR156
102	A10	F2RL3
102	A11	GLP2R
102	A12	P2RY5
102	A13	EPHA5
102	A14	MLCK
102	A15	PSKH1
102	A16	AURKC
102	A17	PRKCE
102	A18	AK1
102	A19	TRPM6
102	A20	CLK1
102	A21	PAPSS2
102	A22	RPS6KB2
102	B03	BAI1
102	B04	FSHR
102	B05	OPRM1
102	B06	MC5R
102	B07	GPR74
102	B08	FY
102	B09	FZD3
102	B10	EDG2
102	B11	SMO
102	B12	GPR143
102	B13	PFTK1
102	B14	NME5
102	B15	SRC
102	B16	NEK4
102	B17	CSNK1G1
102	B18	RIOK1
102	B19	AKT1
102	B20	SNRK
102	B21	KIAA1811
102	B22	PDK2
102	C03	GPR42
102	C04	VN1R4
102	C05	ELTD1
102	C06	HTR1A
102	C07	GPR10
102	C08	BRS3
102	C09	GPR55
102	C10	GPR20
102	C11	EMR3
102	C12	P2RY14
102	C13	MYLK2
102	C14	NEK11
102	C15	KIAA1361
102	C16	SNF1LK
102	C17	PTK9
102	C18	LATS1
102	C19	PFKP
102	C20	PRKG1
102	C21	RIOK2
102	C22	FRAP1
102	D03	GPR78
102	D04	EDG7
102	D05	FFAR1
102	D06	GPR107
102	D07	TAAR9
102	D08	GRM3
102	D09	GPR77
102	D10	OPN1SW
102	D11	AVPR1A
102	D12	GPBAR1
102	D13	PDGFRL
102	D14	AK7
102	D15	EPHA10
102	D16	STK17B
102	D17	GOLGA5
102	D18	STK24
102	D19	DGKB
102	D20	STK25
102	D21	CDC7
102	D22	CAMK2G
102	E03	MRGPRE
102	E04	GPR142
102	E05	BDKRB2
102	E06	OR1A1
102	E07	PTHR2
102	E08	OPRK1
102	E09	PVR
102	E10	CCR4
102	E11	GPR24
102	E12	HTR3A
102	E13	URKL1
102	E14	MAP3K9
102	E15	GUCY2D
102	E16	CAMKK2
102	E17	CAMKIINALPHA
102	E18	KIT
102	E19	PRKCL1
102	E20	RIPK2
102	E21	CKMT1B
102	E22	MKNK2
102	F03	RXFP3
102	F04	ADRA2A
102	F05	CYSLTR1
102	F06	CMKLR1
102	F07	SSTR5
102	F08	GPR109B
102	F09	ADMR
102	F10	NPY
102	F11	XPR1
102	F12	PTGIR
102	F13	TNNI3K
102	F14	ALS2CR7
102	F15	HCK
102	F16	CKS1B
102	F17	BMP2K
102	F18	PHKB
102	F19	TRIO
102	F20	ETNK1
102	F21	ERK8
102	F22	ADP-GK
102	G03	NTSR1
102	G04	CCRL1
102	G05	GPRC6A
102	G06	CALCR
102	G07	EDNRB
102	G08	GNRHR
102	G09	NPY2R
102	G10	CXCR6
102	G11	EDG5
102	G12	TTK
102	G13	PIK3CG
102	G14	FGFR3
102	G15	IRAK4
102	G16	PCTK3
102	G17	SGK2
102	G18	DYRK4
102	G19	MAP3K2
102	G20	LATS2
102	G21	P101-PI3K
102	G22	DGKG
102	H03	SYK
102	H04	EPHA8
102	H05	DMPK
102	H06	COASY
102	H07	MYO3B
102	H08	PRKWNK2
102	H09	PTK2
102	H10	FER
102	H11	CAMK2B
102	H12	ACVRL1
102	H13	MAST3
102	H14	EFNA3
102	H15	BCKDK
102	H16	ITPKA
102	H17	NEK6
102	H18	BLK
102	H19	DGKK
102	H20	MPP2
102	H21	BUB1
102	H22	UHMK1
102	I03	LYN
102	I04	PAPSS1
102	I05	MAPK4
102	I06	MASTL
102	I07	TRIB1
102	I08	BRD3
102	I09	FLJ34389
102	I10	HK1
102	I11	THNSL1
102	I12	ALS2CR2
102	I13	PRKCM
102	I14	PIK4CB
102	I15	DLG4
102	I16	BTK
102	I17	MAP3K15
102	I18	GSK3A
102	I19	CSNK1E
102	I20	RELA
102	I21	CCRK
102	I22	MAPK9
102	J03	CARKL
102	J04	ADK
102	J05	ABL2
102	J06	PLK1
102	J07	MINK
102	J08	CDKL3
102	J09	MAP3K14
102	J10	MAP3K7
102	J11	CKB
102	J12	CDC2
102	J13	TNK2
102	J14	PDIK1L
102	J15	AXL
102	J16	ANKRD3
102	J17	RIPK1
102	J18	CDC42BPB
102	J19	JAK3
102	J20	STK22D
102	J21	FGFR1
102	J22	PNKP
102	K03	PIM2
102	K04	LRRK2
102	K05	HK2
102	K06	FN3K
102	K07	CRIM1
102	K08	PIK4CA
102	K09	SSTK
102	K10	TAO1
102	K11	NME3
102	K12	PRKAG3
102	K13	ERBB2
102	K14	PRKAG1
102	K15	FLJ10761
102	K16	IGF1R
102	K17	NEK9
102	K18	FLJ23356
102	K19	FLT3
102	K20	PIP5K2A
102	K21	DAPK1
102	K22	FASTK
102	L03	GRK5
102	L04	LIMK1
102	L05	UMPK
102	L06	C7ORF2
102	L07	KSR
102	L08	MAP4K4
102	L09	PRKCN
102	L10	TTBK1
102	L11	ROCK1
102	L12	TEK
102	L13	PRKG2
102	L14	MPP1
102	L15	HSPB8
102	L16	CSF1R
102	L17	DYRK2
102	L18	PRKCL2
102	L19	RPS6KA3
102	L20	EFNA4
102	L21	ADCK1
102	L22	MAP3K8
102	M03	PANK1
102	M04	CSNK1G3
102	M05	CKS2
102	M06	PHKG2
102	M07	MAPK7
102	M08	KCNH8
102	M09	CAMK2D
102	M10	MAP4K5
102	M11	PKN3
102	M12	ATM
102	M13	CDK8
102	M14	MKNK1
102	M15	PIK3C2G
102	M16	CDK4
102	M17	PIM1
102	M18	DGKQ
102	M19	MAP3K12
102	M20	STK22C
102	M21	PI4KII
102	M22	TAF1L
102	N03	PHKA2
102	N04	MULK
102	N05	GRK6
102	N06	BMPR1B
102	N07	STK33
102	N08	MIDORI
102	N09	RNASEL
102	N10	STK16
102	N11	RFP
102	N12	PIP5KL1
102	N13	CAMK1G
102	N14	HSMDPKIN
102	N15	STK10
102	N16	AIP1
102	N17	ABL1
102	N18	PAK6
102	N19	FN3KRP
102	N20	AKT2
102	N21	KIAA0999
102	N22	PLK4
102	O03	NEK5
102	O04	PLK2
102	O05	CSNK1G2
102	O06	MARK2
102	O07	TNIK
102	O08	CALM3
102	O09	PKM2
102	O10	CDKL5
102	O11	PIK3CA
102	O12	KIAA1804
102	O13	HIPK3
102	O14	TYRO3
102	O15	MAPK3
102	O16	YES1
102	O17	NYD-SP25
102	O18	CDADC1
102	O19	STK31
102	O20	AKT3
102	O21	NLK
102	O22	PFKFB3
102	P03	NAGK
102	P04	IRAK1
102	P05	EEF2K
102	P06	ANKK1
102	P07	MAP3K5
102	P08	PRKAA1
102	P09	RPS6KA4
102	P10	CALM1
102	P11	FLJ32685
102	P12	ITPKC
102	P13	TESK2
102	P14	EPHA7
102	P15	STK35
102	P16	STK11
102	P17	JAK2
102	P18	BRD2
102	P19	CDKN2C
102	P20	MAP2K3
102	P21	LCK
102	P22	CIB2
103	A03	AAK1
103	A04	PIK3R2
103	A05	IRAK2
103	A06	ACVR1C
103	A07	ACVR1B
103	A08	CPNE3
103	A09	CAMK1
103	A10	MARK3
103	A11	MGC42105
103	A12	CHEK1
103	A13	IKBKE
103	A14	CSNK1A1L
103	A15	PIP5K1A
103	A16	STK17A
103	A17	TEX14
103	A18	MAPKAPK2
103	A19	LTK
103	A20	CASK
103	A21	DYRK1B
103	A22	SBK1
103	B03	SCAP1
103	B04	CDC2L2
103	B05	STK3
103	B06	FLT4
103	B07	CDC2L1
103	B08	MAP2K7
103	B09	EPHB6
103	B10	MARK1
103	B11	PRKAR2A
103	B12	PINK1
103	B13	PCTK1
103	B14	MAP3K4
103	B15	STK38L
103	B16	MGC4796
103	B17	PKIA
103	B18	RBKS
103	B19	PHKA1
103	B20	ERN1
103	B21	STYK1
103	B22	ARK5
103	C03	MUSK
103	C04	ULK2
103	C05	MGC8407
103	C06	AURKA
103	C07	PAK4
103	C08	MAPK1
103	C09	MAST4
103	C10	CKMT2
103	C11	PIK3R3
103	C12	ACVR2
103	C13	PIP5K1B
103	C14	DGUOK
103	C15	PANK3
103	C16	SRPK2
103	C17	CLK2
103	C18	TGFBR2
103	C19	STK22B
103	C20	GAK
103	C21	RPS6KA2
103	C22	MAPK6
103	D03	PRKWNK3
103	D04	PRKCZ
103	D05	ITK
103	D06	CAMKK1
103	D07	STK36
103	D08	MAPK8
103	D09	TGFBR1
103	D10	CDK5R2
103	D11	LOC91461
103	D12	DKFZP761P0423
103	D13	GRK7
103	D14	ADRBK1
103	D15	CDK10
103	D16	CDKN1A
103	D17	PANK2
103	D18	EPHA3
103	D19	PYCS
103	D20	IHPK1
103	D21	BRD4
103	D22	TEC
103	E03	DUSTYPK
103	E04	PDK3
103	E05	DGKA
103	E06	C9ORF12
103	E07	PTK6
103	E08	PAK1
103	E09	RYK
103	E10	PDXK
103	E11	NEK8
103	E12	GK
103	E13	FRDA
103	E14	PRPS2
103	E15	AK5
103	E16	MAST2
103	E17	CDK5R1
103	E18	WEE1
103	E19	CDK6
103	E20	CDKN2D
103	E21	PRKCQ
103	E22	PRKAG2
103	F03	KSR2
103	F04	PRKAR1A
103	F05	NUP62
103	F06	ROR2
103	F07	PIP5K2C
103	F08	ACVR1
103	F09	PRKACB
103	F10	STK39
103	F11	MATK
103	F12	RPS6KB1
103	F13	MAP3K3
103	F14	FGFRL1
103	F15	NME1
103	F16	TNK1
103	F17	STK29
103	F18	NTRK3
103	F19	LMTK2
103	F20	DTYMK
103	F21	PIK3R4
103	F22	GCK
103	G03	RFK
103	G04	TTBK2
103	G05	CDC42BPA
103	G06	GSG2
103	G07	HIPK1
103	G08	MAP3K11
103	G09	AURKB
103	G10	LIMK2
103	G11	GRK4
103	G12	LOC340156
103	G13	EPHB2
103	G14	SGKL
103	G15	DLG3
103	G16	RET
103	G17	MAP2K6
103	G18	RPS6KC1
103	G19	NME7
103	G20	MAP3K10
103	G21	UCK1
103	G22	FGFR2
103	H03	PRKX
103	H04	GNE
103	H05	PRKAR1B
103	H06	MVK
103	H07	PKIB
103	H08	CDK5
103	H09	ADCK4
103	H10	HRI
103	H11	MAPKAPK3
103	H12	ACVR2B
103	H13	ERBB3
103	H14	NEK3
103	H15	COL4A3BP
103	H16	CDC2L5
103	H17	ALK
103	H18	SPEG
103	H19	TP53RK
103	H20	EFNA5
103	H21	MAPK13
103	H22	TRIB2
103	I03	EGFR
103	I04	ROS1
103	I05	HK3
103	I06	DDR2
103	I07	DAPK2
103	I08	ITPK1
103	I09	EPHA2
103	I10	PHKG1
103	I11	FUK
103	I12	AK3
103	I13	DGKH
103	I14	FRK
103	I15	PIK3CB
103	I16	KCNH2
103	I17	CDKL1
103	I18	NTRK2
103	I19	AATK
103	I20	PRKCG
103	I21	STK38
103	I22	PMVK
103	J03	CSNK2A2
103	J04	VRK2
103	J05	KALRN
103	J06	ARAF1
103	J07	BCR
103	J08	DCK
103	J09	MGC16169
103	J10	SRP72
103	J11	DGKI
103	J12	CSK
103	J13	EPHA1
103	J14	RAF1
103	J15	PRKCSH
103	J16	PRKCD
103	J17	ATR
103	J18	CAMK2A
103	J19	KDR
103	J20	TAF1
103	J21	CDK11
103	J22	SNARK
103	K03	IKBKAP
103	K04	ADRBK2
103	K05	ICK
103	K06	ADCK2
103	K07	PI4K2B
103	K08	TRIB3
103	K09	FLJ23074
103	K10	HIPK2
103	K11	PRPS1
103	K12	CSNK1D
103	K13	SCYL1
103	K14	PRKAB2
103	K15	STK32B
103	K16	MAP3K7IP1
103	K17	PRKR
103	K18	RIPK3
103	K19	ULK4
103	K20	SPHK2
103	K21	TESK1
103	K22	CSNK2B
103	L03	DYRK3
103	L04	TYK2
103	L05	MYO3A
103	L06	SPHK1
103	L07	ASK
103	L08	PDGFRB
103	L09	FGR
103	L10	ROR1
103	L11	CRK7
103	L12	CDKN1B
103	L13	ERBB4
103	L14	PFKFB4
103	L15	PKMYT1
103	L16	PACE-1
103	L17	IKBKB
103	L18	MAP3K13
103	L19	CAMK1D
103	L20	IRAK3
103	L21	MOS
103	L22	PIP5K2B
103	M03	PACSIN1
103	M04	DAPK3
103	M05	PIK3R1
103	M06	PRKY
103	M07	MAP3K1
103	M08	ZAP70
103	M09	STK23
103	M10	PTK7
103	M11	RPS6KL1
103	M12	RPS6KA6
103	M13	STK4
103	M14	BAIAP1
103	M15	SLK
103	M16	CDKN1C
103	M17	PIP5K1C
103	M18	PFKL
103	M19	PCK1
103	M20	CDK9
103	M21	FGFR4
103	M22	CRKL
103	N03	SRPK1
103	N04	PRKACA
103	N05	PTK2B
103	N06	MERTK
103	N07	CERK
103	N08	NUCKS
103	N09	CIT
103	N10	CDKL4
103	N11	KIAA2002
103	N12	OSR1
103	N13	RPS6KA5
103	N14	STK32C
103	N15	PRKD2
103	N16	LYK5
103	N17	COMMD3
103	N18	TK2
103	N19	CSNK2A1
103	N20	SRMS
103	N21	MAP4K2
103	N22	PDK1
103	O03	RAGE
103	O04	BMPR2
103	O05	NRBP2
103	O06	MAP2K4
103	O07	FLJ13052
103	O08	TLK2
103	O09	TJP2
103	O10	ADCK5
103	O11	MAPK11
103	O12	PGK2
103	O13	MELK
103	O14	PRKCH
103	O15	PAK3
103	O16	PFKFB1
103	O17	INSRR
103	O18	DLG2
103	O19	PIP5K3
103	O20	BMPR1A
103	O21	PRPS1L1
103	O22	IGF2R
103	P03	BUB1B
103	P04	MAP2K5
103	P05	LAK
103	P06	CDK7
103	P07	LRRK1
103	P08	FLJ25006
103	P09	MAPK14
103	P10	TBK1
103	P11	ERN2
103	P12	PRKCI
103	P13	TGFBR3
103	P14	UMP-CMPK
103	P15	CHKA
103	P16	WNK4
103	P17	RPS6KA1
103	P18	IHPK3
103	P19	BMX
103	P20	CLK4
103	P21	PAK2
103	P22	LOC390226
104	A03	CSNK1A1
104	A04	NME2
104	A05	MAK
104	A06	PIK3CD
104	A07	MAP3K6
104	A08	BRDT
104	A09	EIF2AK4
104	A10	NME6
104	A11	DYRK1A
104	A12	CAMK4
104	A13	EYA4
104	A14	DUSP5
104	A15	PTPRD
104	A16	DUSP4
104	A17	MTM1
104	A18	PSPH
104	A19	CDC25C
104	A20	PPP2R4
104	A21	PTPRT
104	A22	CTDP1
104	B03	JIK
104	B04	PKLR
104	B05	PAK7
104	B06	VRK1
104	B07	EPHA6
104	B08	GUCY2C
104	B09	PNCK
104	B10	VRK3
104	B11	PDGFRA
104	B12	DDR1
104	B13	NUDT15
104	B14	PTPN2
104	B15	PIB5PA
104	B16	PTPRH
104	B17	PPM1B
104	B18	FLJ23751
104	B19	PPP4C
104	B20	NUDT1
104	B21	PHPT1
104	B22	PTPN21
104	C03	PTK9L
104	C04	PIK3C2A
104	C05	STK32A
104	C06	GTF2H1
104	C07	TOPK
104	C08	ZAK
104	C09	PDK4
104	C10	CHUK
104	C11	TPK1
104	C12	C14ORF20
104	C13	EYA2
104	C14	DLG1
104	C15	PR48
104	C16	MK-STYX
104	C17	INPP4A
104	C18	PTPN13
104	C19	PGAM2
104	C20	EPM2A
104	C21	PPM1A
104	C22	PPP1CC
104	D03	PIM3
104	D04	LMTK3
104	D05	CHEK2
104	D06	JAK1
104	D07	EIF2AK3
104	D08	PIK3C3
104	D09	ROCK2
104	D10	PIK3C2B
104	D11	SGK
104	D12	CLK3
104	D13	DKFZP566K0524
104	D14	NT5C3
104	D15	G6PC
104	D16	ACP2
104	D17	PPP2R2A
104	D18	PTPN18
104	D19	PTPN11
104	D20	PPFIA1
104	D21	PPP1R14B
104	D22	PTPRA
104	E03	PXK
104	E04	HUNK
104	E05	MAP4K1
104	E06	PCTK2
104	E07	INSR
104	E08	HIPK4
104	E09	SIK2
104	E10	MET
104	E11	FYN
104	E12	DKFZP434C131
104	E13	PPP3R1
104	E14	PPP2R3A
104	E15	FLJ25449
104	E16	FLJ22405
104	E17	INPP5E
104	E18	KIAA0310
104	E19	DUSP14
104	E20	SSH1
104	E21	DUSP3
104	E22	ILKAP
104	F03	SAST
104	F04	NEK2
104	F05	MAPKAPK5
104	F06	NRK
104	F07	PFKFB2
104	F08	MARK4
104	F09	EPHB1
104	F10	MAGI-3
104	F11	IKBKG
104	F12	N4BP2
104	F13	PTPN6
104	F14	SET
104	F15	NUDT3
104	F16	NT5C1A
104	F17	DUSP19
104	F18	CILP
104	F19	ACP6
104	F20	G6PC2
104	F21	NT5C
104	F22	PPM2C
104	G03	NEK1
104	G04	XYLB
104	G05	RP6-213H19.1
104	G06	SMG1
104	G07	IHPK2
104	G08	ILK
104	G09	PSKH2
104	G10	NRBP
104	G11	ULK1
104	G12	PRKCA
104	G13	PPP2R1A
104	G14	PTPN23
104	G15	CDKN3
104	G16	PPAP2B
104	G17	IMPA2
104	G18	PTPN14
104	G19	PPP2R2B
104	G20	PPP1R7
104	G21	SSH2
104	G22	KIAA0377
104	H03	CDKL2
104	H04	FES
104	H05	PRKAB1
104	H06	HAK
104	H07	CDK2
104	H08	MAP2K2
104	H09	MAPK10
104	H10	CALM2
104	H11	KHK
104	H12	GUK1
104	H13	TENS1
104	H14	PON2
104	H15	PPP6C
104	H16	PPP5C
104	H17	TPTE2
104	H18	PPAP2C
104	H19	PPP1R1C
104	H20	PTP4A3
104	H21	PPP1R2
104	H22	WBP11
104	I03	CKM
104	I04	MAP4K3
104	I05	PRKDC
104	I06	PRPF4B
104	I07	RIOK3
104	I08	KIAA1765
104	I09	EXOSC10
104	I10	PGK1
104	I11	AK3L1
104	I12	PLK3
104	I13	PPP1R1A
104	I14	SGPP2
104	I15	PTPLB
104	I16	ALPI
104	I17	BPNT1
104	I18	ACP5
104	I19	INPP5A
104	I20	PPM1E
104	I21	FBP1
104	I22	PPM1F
104	J03	EFNB3
104	J04	EPHB3
104	J05	PRKCB1
104	J06	DGKD
104	J07	EPHB4
104	J08	MGC45428
104	J09	CHKB
104	J10	PRKAR2B
104	J11	PCK2
104	J12	AMHR2
104	J13	PPP2R1B
104	J14	FBP2
104	J15	DUSP7
104	J16	PPFIA4
104	J17	IGBP1
104	J18	DUSP13
104	J19	SBF1
104	J20	PPP1R8
104	J21	NT5C1B
104	J22	PPP1R12A
104	K03	DUSP21
104	K04	CDKN2B
104	K05	DLG1
104	K06	C9ORF96
104	K07	MAP2K1
104	K08	GALK2
104	K09	NTRK1
104	K10	NME4
104	K11	BRAF
104	K12	PASK
104	K13	C9ORF67
104	K14	NUDT12
104	K15	CDC25B
104	K16	NUDT4
104	K17	PTPN1
104	K18	DUSP15
104	K19	PPP1R13B
104	K20	DKFZP761G058
104	K21	MTMR7
104	K22	CTDSP2
104	L03	HUS1
104	L04	TLK1
104	L05	PFKM
104	L06	PRKAA2
104	L07	ITPKB
104	L08	MPP3
104	L09	CDK3
104	L10	PDPK1
104	L11	C10ORF89
104	L12	EPHA4
104	L13	THTPA
104	L14	DUSP22
104	L15	PTPRR
104	L16	PPP2R5D
104	L17	ACPP
104	L18	SSH3
104	L19	LPPR4
104	L20	PTPN22
104	L21	PTPN4
104	L22	PPFIBP2
104	M03	DCAMKL1
104	M04	GK2
104	M05	KUB3
104	M06	TRPM7
104	M07	MYLK
104	M08	GUCY2F
104	M09	GSK3B
104	M10	MST1R
104	M11	AK2
104	M12	NEK7
104	M13	PPP1R12B
104	M14	PPP3R2
104	M15	CDC14B
104	M16	NUDT5
104	M17	PPFIA3
104	M18	PTPRG
104	M19	DUSP18
104	M20	NT5E
104	M21	PPM1L
104	M22	MTMR6
104	N03	PRKWNK1
104	N04	TSKS
104	N05	STK19
104	N06	MAPK12
104	N07	GALK1
104	N08	IPMK
104	N09	PANK4
104	N10	PRKACG
104	N11	FLT1
104	N12	DOT1L
104	N13	PPM1G
104	N14	ALPP
104	N15	PPP1R16B
104	N16	MINPP1
104	N17	PTPN9
104	N18	PTPN12
104	N19	PTPRU
104	N20	DUSP2
104	N21	PPP1R3D
104	N22	PTP4A2
104	O03	DUSP10
104	O04	PPP1R3C
104	O05	CTDSP1
104	O06	PTPRJ
104	O07	NT5M
104	O08	CDC25A
104	O09	PPP3CA
104	O10	ALPPL2
104	O11	SGPP1
104	O12	PPP1R3A
104	O13	PGAM4
104	O14	ENPP7
104	O15	STYX
104	O16	PON1
104	O17	MGC10067
104	O18	PPP2R2D
104	O19	DLG7
104	O20	PTPN20A
104	O21	SYNJ1
104	O22	PPP1CB
104	P03	PTPN5
104	P04	DUSP11
104	P05	PTPDC1
104	P06	MTMR4
104	P07	PPP1R1B
104	P08	G6PC3
104	P09	FLJ32332
104	P10	PTPRO
104	P11	ALPL
104	P12	NUDT14
104	P13	DUSP8
104	P14	IMPA1
104	P15	PPM1D
104	P16	PTPRC
104	P17	PPAPDC2
104	P18	DUSP9
104	P19	PPAP2A
104	P20	PDP2
104	P21	INPP4B
104	P22	MTMR3
105	A03	ACP1
105	A04	TIMM50
105	A05	EYA1
105	A06	NT5C2
105	A07	MTMR1
105	A08	PPP2CZ
105	A09	PPP2R5E
105	A10	PPP2CB
105	A11	OCRL
105	A12	MTMR2
105	A13	PMPCB
105	A14	CAPN9
105	A15	CPB2
105	A16	MASP2
105	A17	ADAMTS13
105	A18	SOLH
105	A19	IMP5
105	A20	PSMB1
105	A21	SHH
105	A22	CORIN
105	B03	PPEF1
105	B04	DUSP1
105	B05	ACPT
105	B06	PTPRZ1
105	B07	PTPLA
105	B08	PPP2R5A
105	B09	PTPMT1
105	B10	DUSP12
105	B11	PPP3CC
105	B12	INPPL1
105	B13	CTSC
105	B14	KLK5
105	B15	DF
105	B16	MAP1D
105	B17	PRSS7
105	B18	MMP25
105	B19	ATG4D
105	B20	ELA2
105	B21	SENP5
105	B22	CAPN3
105	C03	PPP2CA
105	C04	TA-PP2C
105	C05	PTPRB
105	C06	PPP1R15B
105	C07	INPP5B
105	C08	PTP4A1
105	C09	PALD
105	C10	PGAM1
105	C11	NUDT9
105	C12	SYNJ2
105	C13	CORO7
105	C14	SENP1
105	C15	DPEP2
105	C16	RNF149
105	C17	CASP9
105	C18	YME1L1
105	C19	ADAMTS8
105	C20	CPVL
105	C21	BLMH
105	C22	CYLD
105	D03	PTPRM
105	D04	PPP3CB
105	D05	MTMR8
105	D06	PTPRN
105	D07	PTPRE
105	D08	DUSP16
105	D09	PTPRS
105	D10	PSPHL
105	D11	DUSP6
105	D12	SACM1L
105	D13	MMP28
105	D14	METAP1
105	D15	PRSS8
105	D16	PCSK9
105	D17	ADAM23
105	D18	ADAM18
105	D19	SENP8
105	D20	CASP7
105	D21	FURIN
105	D22	CLPP
105	E03	INPP5D
105	E04	PTEN
105	E05	PTPRK
105	E06	PPAPDC1
105	E07	NUDT2
105	E08	SKIP
105	E09	PPP2R5B
105	E10	RNGTT
105	E11	PPP1CA
105	E12	BPGM
105	E13	PRSS12
105	E14	KLK14
105	E15	ADAM21
105	E16	ELA3A
105	E17	USP45
105	E18	SUPT16H
105	E19	METAP2
105	E20	SERPINB12
105	E21	RBP3
105	E22	USP13
105	F03	PPFIA2
105	F04	PPP4R1
105	F05	DUSP23
105	F06	MTMR9
105	F07	PPP2R2C
105	F08	PTPRN2
105	F09	PPM1H
105	F10	PTPRF
105	F11	PTPN7
105	F12	PTPN3
105	F13	USP26
105	F14	NPEPPS
105	F15	RELN
105	F16	ACR
105	F17	CASP1
105	F18	MMP2
105	F19	PRTN3
105	F20	CASP14
105	F21	KLK15
105	F22	RNF128
105	G03	PPEF2
105	G04	NUDT11
105	G05	INPP1
105	G06	EYA3
105	G07	CDC14A
105	G08	PTPNS1
105	G09	LHPP
105	G10	PPP1R12C
105	G11	TPTE
105	G12	MMP12
105	G13	ADAMTS14
105	G14	PPP2R5C
105	G15	KLK8
105	G16	ADAM28
105	G17	USP47
105	G18	PSMA4
105	G19	USP4
105	G20	USP10
105	G21	NAALADL2
105	G22	ADAM30
105	H03	PRSS25
105	H04	ADAMTSL1
105	H05	PSMB4
105	H06	IHH
105	H07	GZMA
105	H08	ACE
105	H09	PCOLN3
105	H10	CAPN2
105	H11	PARP11
105	H12	PRSS23
105	H13	PCSK1
105	H14	USP24
105	H15	TPSG1
105	H16	CPZ
105	H17	ACE2
105	H18	CNDP2
105	H19	USP32
105	H20	CAPN10
105	H21	USP34
105	H22	SPPL3
105	I03	DPP4
105	I04	CPXM
105	I05	TFR2
105	I06	DPEP1
105	I07	PITRM1
105	I08	CTSG
105	I09	ADAM7
105	I10	TESSP2
105	I11	MME
105	I12	PCSK4
105	I13	RNF148
105	I14	PRSS15
105	I15	USP36
105	I16	KLK11
105	I17	PAPPA2
105	I18	OVCH1
105	I19	SPCS3
105	I20	CFLAR
105	I21	PRSS1
105	I22	OSGEPL1
105	J03	CTSB
105	J04	MPN2
105	J05	PSMB2
105	J06	PSMAL/GCP III
105	J07	DPP6
105	J08	PHEX
105	J09	BACE1
105	J10	CAPNS1
105	J11	ADAM32
105	J12	ESSPL
105	J13	AZU1
105	J14	MMP3
105	J15	PGA5
105	J16	MEP1A
105	J17	KLK7
105	J18	USP21
105	J19	TLL2
105	J20	ZMPSTE24
105	J21	C1S
105	J22	FLJ90650
105	K03	MMP14
105	K04	MST1
105	K05	CASP4
105	K06	USP8
105	K07	ADAMDEC1
105	K08	KLK12
105	K09	CTSH
105	K10	ZNRF4
105	K11	LOC63929
105	K12	GZMB
105	K13	ANPEP
105	K14	ITGA2B
105	K15	KEL
105	K16	PLGL
105	K17	UQCRC2
105	K18	CTSW
105	K19	C2ORF7
105	K20	C6ORF158
105	K21	GGTLA1
105	K22	SERPIND1
105	L03	SEC11L1
105	L04	DHH
105	L05	CPE
105	L06	APAF1
105	L07	FLJ90661
105	L08	HABP2
105	L09	USP33
105	L10	PSMD9
105	L11	USP52
105	L12	NAPSA
105	L13	MPN
105	L14	TLL1
105	L15	ADAMTS4
105	L16	MEP1B
105	L17	ADAM9
105	L18	ELA1
105	L19	ADAMTS9
105	L20	MBTPS1
105	L21	FLJ32569
105	L22	USP12
105	M03	SERPINF1
105	M04	PSMB3
105	M05	ADAM2
105	M06	PCSK5
105	M07	CPN1
105	M08	TMPRSS3
105	M09	ADAMTS20
105	M10	ADAM17
105	M11	DPP10
105	M12	USP29
105	M13	PSMB9
105	M14	IDE
105	M15	ADAMTS16
105	M16	DPP8
105	M17	ESPL1
105	M18	UFD1L
105	M19	MMP19
105	M20	USP20
105	M21	ADAMTS12
105	M22	HPR
105	N03	USP7
105	N04	TRY1
105	N05	CR1
105	N06	THOP1
105	N07	KLK2
105	N08	CASP8
105	N09	CPA1
105	N10	ICEBERG
105	N11	BAP1
105	N12	ADAM22
105	N13	CLPX
105	N14	NAALADL1
105	N15	F10
105	N16	MGC26605
105	N17	CTSK
105	N18	RHBDL2
105	N19	UCHL5
105	N20	CPA5
105	N21	RNF133
105	N22	TYSND1
105	O03	PSMA3
105	O04	PCSK7
105	O05	SENP3
105	O06	ADAMTS17
105	O07	BACE2
105	O08	LONP
105	O09	RNF167
105	O10	PSMA5
105	O11	MMP17
105	O12	PRSS11
105	O13	CMA1
105	O14	KLK13
105	O15	PEPD
105	O16	CNDP1
105	O17	XPNPEP2
105	O18	ASPRV1
105	O19	F9
105	O20	TFRC
105	O21	CTRC
105	O22	GGTL4
105	P03	APG4A
105	P04	SEC11L3
105	P05	USP6
105	P06	ADAM10
105	P07	ADAM33
105	P08	MMP8
105	P09	ADAMTS3
105	P10	SENP6
105	P11	TINAG
105	P12	ATG4C
105	P13	DPEP3
105	P14	CAPN11
105	P15	REN
105	P16	USP9X
105	P17	PLAU
105	P18	PA2G4
105	P19	PCSK6
105	P20	CPA3
105	P21	HAT
105	P22	CASP10
106	A03	SPG7
106	A04	CTSO
106	A05	PREP
106	A06	F2
106	A07	MMP16
106	A08	ELA2A
106	A09	F11
106	A10	CTSE
106	A11	ADAMTS7
106	A12	MMP7
106	A13	CPO
106	A14	DNPEP
106	A15	GGH
106	A16	CTSL
106	A17	TMPRSS5
106	A18	PRSS22
106	A19	HGFAC
106	A20	PSMA7
106	A21	PRSS16
106	A22	RNF130
106	B03	ECE2
106	B04	USP44
106	B05	GZMK
106	B06	TSP50
106	B07	TMPRSS4
106	B08	USP1
106	B09	USP14
106	B10	USP46
106	B11	TMPRSS6
106	B12	PSMB10
106	B13	ADAM8
106	B14	TMPRSS11A
106	B15	PSMB6
106	B16	USP3
106	B17	ADAMTS19
106	B18	TMPRSS9
106	B19	ZFYVE9
106	B20	MMP11
106	B21	MMP9
106	B22	ATG4B
106	C03	IMMP2L
106	C04	CASP2
106	C05	CPB1
106	C06	MMP21
106	C07	MMP10
106	C08	ECEL1
106	C09	PRSS21
106	C10	TMPRSS13
106	C11	PCSK2
106	C12	CLN2
106	C13	NAALAD2
106	C14	SPCS1
106	C15	PIGK
106	C16	LPA
106	C17	KLK1
106	C18	CPA4
106	C19	PGPEP1
106	C20	PPGB
106	C21	USP37
106	C22	SERPINA1
106	D03	BF
106	D04	ACY1
106	D05	SERPINB2
106	D06	PLG
106	D07	DESC1
106	D08	MASP1
106	D09	LAP3
106	D10	SCRN2
106	D11	PSMA1
106	D12	TPSD1
106	D13	TPP2
106	D14	USP9Y
106	D15	ADAM19
106	D16	CAPN13
106	D17	OSGEP
106	D18	USP25
106	D19	MALT1
106	D20	PROC
106	D21	AFG3L2
106	D22	LGMN
106	E03	TNFAIP3
106	E04	EOS
106	E05	ABHD5
106	E06	USP48
106	E07	CPXM2
106	E08	ADAMTS18
106	E09	HP
106	E10	CR2
106	E11	PSMB7
106	E12	RHBDL1
106	E13	SPPL2A
106	E14	USP39
106	E15	MMP13
106	E16	LRP12
106	E17	CTSD
106	E18	KLK9
106	E19	KLK6
106	E20	MMP26
106	E21	LCN7
106	E22	BMP1
106	F03	OMA1
106	F04	PLAT
106	F05	PROZ
106	F06	LTF
106	F07	ARTS-1
106	F08	ADAMTS5
106	F09	ADAMTS15
106	F10	RHBDL4
106	F11	SENP2
106	F12	C9ORF3
106	F13	C1RL
106	F14	DYT1
106	F15	GGTL3
106	F16	MIPEP
106	F17	APEH
106	F18	ADAMTS6
106	F19	USP49
106	F20	CPA2
106	F21	LNPEP
106	F22	CASP6
106	G03	LMLN
106	G04	ADAMTS10
106	G05	USP5
106	G06	UCHL1
106	G07	CPD
106	G08	PSMA2
106	G09	MBTPS2
106	G10	ST14
106	G11	ST5
106	G12	ADAMTS1
106	G13	CTSS
106	G14	SERPINA3
106	G15	LRAP
106	G16	PAPPA
106	G17	DPP9
106	G18	EID2
106	G19	KCNJ5
106	G20	CATSPER4
106	G21	FXYD2
106	G22	TRPV2
106	H03	KLK4
106	H04	MELL1
106	H05	ELA2B
106	H06	TMPRSS2
106	H07	XPNPEP1
106	H08	PGC
106	H09	ENPEP
106	H10	CAPN1
106	H11	CAPN7
106	H12	UQCRC1
106	H13	CLCN6
106	H14	KCTD12
106	H15	KCNH1
106	H16	GRIK2
106	H17	TRPC4
106	H18	FXYD1
106	H19	SCN2B
106	H20	CACNA1B
106	H21	CNGB1
106	H22	KCNV1
106	I03	KLK10
106	I04	RNF150
106	I05	ADAM12
106	I06	RNF13
106	I07	USP2
106	I08	USP31
106	I09	C1R
106	I10	RNPEP
106	I11	DKFZP586H2123
106	I12	HPN
106	I13	TTYH3
106	I14	CFTR
106	I15	CACNB1
106	I16	ITPR3
106	I17	KCNH4
106	I18	TRPV4
106	I19	MLC1
106	I20	KCNJ1
106	I21	ACCN4
106	I22	SCNN1A
106	J03	HM13
106	J04	USP43
106	J05	SCRN1
106	J06	CASP5
106	J07	ADAM20
106	J08	C2
106	J09	SERPINE1
106	J10	CPA6
106	J11	IF
106	J12	ADAMTS2
106	J13	GABRG2
106	J14	KCNJ11
106	J15	KCNK4
106	J16	KCNMA1
106	J17	PKD2
106	J18	KCNQ2
106	J19	KCNS3
106	J20	GRIA3
106	J21	CLCNKA
106	J22	CLCNKB
106	K03	PRCP
106	K04	C20ORF13
106	K05	USP15
106	K06	RNPEPL1
106	K07	USP28
106	K08	CTSF
106	K09	CASP3
106	K10	HTRA3
106	K11	USP38
106	K12	HGF
106	K13	MCOLN3
106	K14	KCNJ2
106	K15	CLCN3
106	K16	KCND1
106	K17	SLC9A1
106	K18	CLIC4
106	K19	KCNE4
106	K20	CNGB3
106	K21	KCNH7
106	K22	KCNJ4
106	L03	UCHL3
106	L04	PSMB8
106	L05	CTRB1
106	L06	USP18
106	L07	SENP7
106	L08	GRP58
106	L09	MMP15
106	L10	RCE1
106	L11	ADAM29
106	L12	CTSZ
106	L13	TRPC3
106	L14	TRPC7
106	L15	ABCC8
106	L16	KCNJ16
106	L17	CLCA2
106	L18	TRPM8
106	L19	KCNA4
106	L20	KCNB1
106	L21	GABRA2
106	L22	SCN11A
106	M03	ADAM15
106	M04	NPEPL1
106	M05	PSMB5
106	M06	PARK2
106	M07	MMP1
106	M08	CTSL2
106	M09	DPP7
106	M10	AEBP1
106	M11	F7
106	M12	FOLH1
106	M13	GABRA3
106	M14	GRIN3B
106	M15	GRIN3A
106	M16	KCNS1
106	M17	KCNG2
106	M18	HCN1
106	M19	CACNA1H
106	M20	TRPV6
106	M21	GABRE
106	M22	KCTD7
106	N03	SCPEP1
106	N04	NLN
106	N05	F12
106	N06	USP16
106	N07	FAP
106	N08	GZMH
106	N09	AGTPBP1
106	N10	APP
106	N11	CAPN6
106	N12	PSFL
106	N13	KCNMB2
106	N14	KCNJ12
106	N15	P2RX2
106	N16	SCN4A
106	N17	GABRD
106	N18	KCNN4
106	N19	CACNG4
106	N20	KCNQ5
106	N21	KCNG3
106	N22	KCNE2
106	O03	CAPN5
106	O04	USP11
106	O05	USP30
106	O06	MMP20
106	O07	P11
106	O08	KLKB1
106	O09	CRBN
106	O10	MMP27
106	O11	CTRL
106	O12	KYNU
106	O13	NOX5
106	O14	CHRNE
106	O15	KCNQ4
106	O16	RYR3
106	O17	GABRR3
106	O18	ITPR1
106	O19	CLCN1
106	O20	SCN1B
106	O21	PKD1
106	O22	KCNA6
106	P03	MMP24
106	P04	NRD1
106	P05	TRHDE
106	P06	ECE1
106	P07	DPP3
106	P08	CPM
106	P09	PGCP
106	P10	ADAM11
106	P11	SPPL2B
106	P12	PSMA6
106	P13	KCNT2
106	P14	CATSPER3
106	P15	GABRR1
106	P16	CHRNA5
106	P17	P2RX5
106	P18	P2RX1
106	P19	TPCN1
106	P20	PR1
106	P21	CLIC6
106	P22	GABRA1
107	A03	CHRNA7
107	A04	CLNS1A
107	A05	ANXA7
107	A06	GLRA2
107	A07	CLCA3
107	A08	CNGA1
107	A09	RYR2
107	A10	CHRNA2
107	A11	CNGA3
107	A12	APXL
107	A13	NOX1
107	A14	KCNAB1
107	A15	FXYD4
107	A16	KCTD4
107	A17	KCNIP1
107	A18	KCNH5
107	A19	CACNG3
107	A20	P2RX4
107	A21	KCNMB4
107	A22	KCNE1
107	B03	KCNK6
107	B04	FXYD3
107	B05	KCNV2
107	B06	GMRP-1
107	B07	TRPM3
107	B08	GABRB2
107	B09	KCNQ1
107	B10	KCNK18
107	B11	SCN9A
107	B12	KCNJ3
107	B13	SCN7A
107	B14	KCNK15
107	B15	KCNK16
107	B16	KCNMB1
107	B17	HCN2
107	B18	CACNG1
107	B19	HTR3C
107	B20	AQP7
107	B21	TOMM40
107	B22	KCND2
107	C03	CUL5
107	C04	SCN2A2
107	C05	TRPC5
107	C06	LGICZ
107	C07	SNAP25
107	C08	GRIN2D
107	C09	KCNK10
107	C10	KCNJ15
107	C11	HCN4
107	C12	CACNB3
107	C13	KCNIP4
107	C14	GABRR2
107	C15	RYR1
107	C16	CACNA1E
107	C17	KCNH3
107	C18	STX1B2
107	C19	CLIC1
107	C20	KCTD10
107	C21	FXYD7
107	C22	CLCA4
107	D03	KCNA2
107	D04	KCNB2
107	D05	TRPV3
107	D06	CACNA1F
107	D07	KCTD13
107	D08	GLRA1
107	D09	KCNK13
107	D10	KCTD2
107	D11	CNGA2
107	D12	MCOLN2
107	D13	TSPO
107	D14	TRPA1
107	D15	CHRNB2
107	D16	TRPV1
107	D17	KCNJ10
107	D18	CHRNB1
107	D19	KCNG1
107	D20	GRIK1
107	D21	GLRA4
[truncated: 16,561 more rows]

## Sheet: Controls
Well	Pooled siRNA controls
C02	Non-targeting
I02	Non-targeting
N02	Non-targeting
F23	Non-targeting
L23	Non-targeting
E02	ZC3HAV1
K02	ZC3HAV1
C23	ZC3HAV1
H23	ZC3HAV1
O23	ZC3HAV1
