# Supplementary material for: TRIM25 Enhances the Antiviral Action of Zinc-Finger Antiviral Protein (ZAP)
Source: PLoS Pathog. 2017 Jan 6;13(1):e1006145. doi: 10.1371/journal.ppat.1006145 (PMC5245905; doi:10.1371/journal.ppat.1006145)
Supplement: S3 Table — Host proteins that were significantly (Student’s t-test, p<0.05) up- or down regulated by 1.5 linear fold or more in TRIM25 pulldown in the presence of ZAPS are shown. The proteins with the most significant p-value are listed first. LFQ and iBAQ values were used to calculate fold differences of proteins between samples with and without ZAPS, and abundance of different proteins, respectively (see the section on MS in Materials and Methods). (XLSX) [file ppat.1006145.s008.xlsx]

## Sheet: Student's t-test, p<0.05
Protein names	Gene names	Peptides	Razor + unique peptides	Unique peptides	iBAQ	-Log10(Student's t-test p-value)	Log2(level with ZAPS/level without ZAPS)	TRIM25-V5 Replicate #1 LFQ intensity	TRIM25-V5 Replicate #2 LFQ intensity	TRIM25-V5 Replicate #3 LFQ intensity	TRIM25-V5 with ZAPS Replicate #1 LFQ intensity	TRIM25-V5 with ZAPS Replicate #2 LFQ intensity	TRIM25-V5 with ZAPS Replicate #3 LFQ intensity
Ubiquitin-40S ribosomal protein S27a;Ubiquitin;40S ribosomal protein S27a;Ubiquitin-60S ribosomal protein L40;Ubiquitin;60S ribosomal protein L40;Polyubiquitin-B;Ubiquitin;Polyubiquitin-C;Ubiquitin	RPS27A	7	7	7	28.7929	3.63532	-0.67086	28.7983	28.6974	28.8033	28.172	28.0327	28.0817
Zinc finger CCCH-type antiviral protein 1	ZC3HAV1	30	30	30	24.6748	3.42468	7.30439	20.0513	22.3059	21.2325	28.3183	28.6612	28.5233
60S ribosomal protein L30	RPL30	9	9	9	29.351	2.40766	0.7296	28.7003	28.5182	28.5322	29.2635	29.158	29.5181
Protein-L-isoaspartate O-methyltransferase;Protein-L-isoaspartate(D-aspartate) O-methyltransferase	PCMT1	2	2	2	22.122	2.36091	-0.909593	23.2974	23.6662	23.6179	22.8273	22.4967	22.5286
Signal recognition particle 9 kDa protein	SRP9	2	2	2	23.1497	2.23569	1.57084	21.578	21.7053	22.4489	23.684	23.3113	23.4493
60S ribosomal protein L9	RPL9	5	5	5	26.053	2.2325	0.940962	25.342	25.5272	25.8658	26.6373	26.5677	26.3528
Serine/arginine repetitive matrix protein 1	SRRM1	4	4	4	19.8796	2.09077	1.0862	21.0137	20.8456	20.6318	21.7107	22.3018	21.7372
Splicing factor 3B subunit 5	SF3B5	2	2	2	23.4893	1.84509	2.6579	21.4847	20.1069	19.9422	23.6179	22.3419	23.5477
NHP2-like protein 1;NHP2-like protein 1, N-terminally processed	NHP2L1	4	4	4	24.4074	1.79144	0.736875	24.3511	24.1227	23.8257	24.6445	24.8633	25.0023
40S ribosomal protein S12	RPS12	9	9	9	30.3586	1.72729	0.646544	30.0342	29.9217	29.5631	30.434	30.3598	30.6648
Protein LLP homolog	LLPH	2	2	2	23.3701	1.34128	-1.68564	21.9195	22.2123	23.0899	20.3934	21.6504	20.121
